# Supplementary material for: Substituent-controlled preference of carbonyl group–metal coordination in d8metal complexes with non-symmetric pentadentate ligands. Structural and stereochemical aspects
Source: Royal Society of Chemistry journal article supplement (doi:10.1039/c3dt53312c), 2014-01-01
Supplement: c3dt53312c.pdf [file c3dt53312c.pdf]

## Electronic Supplementary Information

# Substituent-controlled preference of carbonyl group–metal coordination in $d^8$ metal complexes with non-symmetric pentadentate ligands. Structural and stereochemical aspects

Jianlin Han, Taizo Ono, Hidehiro Uekusa, Karel D. Klika and Vadim A. Soloshonok\*

### Table of Contents

|                                                                                           | Page |
|-------------------------------------------------------------------------------------------|------|
| 1. $^1\text{H}$ , $^{13}\text{C}$ and $^{19}\text{F}$ NMR spectra for compounds 5–14----- | S2   |
| 2. Single crystal X-ray data for complex 12-----                                          | S12  |
| 2. Single crystal X-ray data for complex 13-----                                          | S27  |
| 2. Single crystal X-ray data for complex 14-----                                          | S42  |

### $^1\text{H}$ and $^{13}\text{C}$ NMR spectra for compound 5

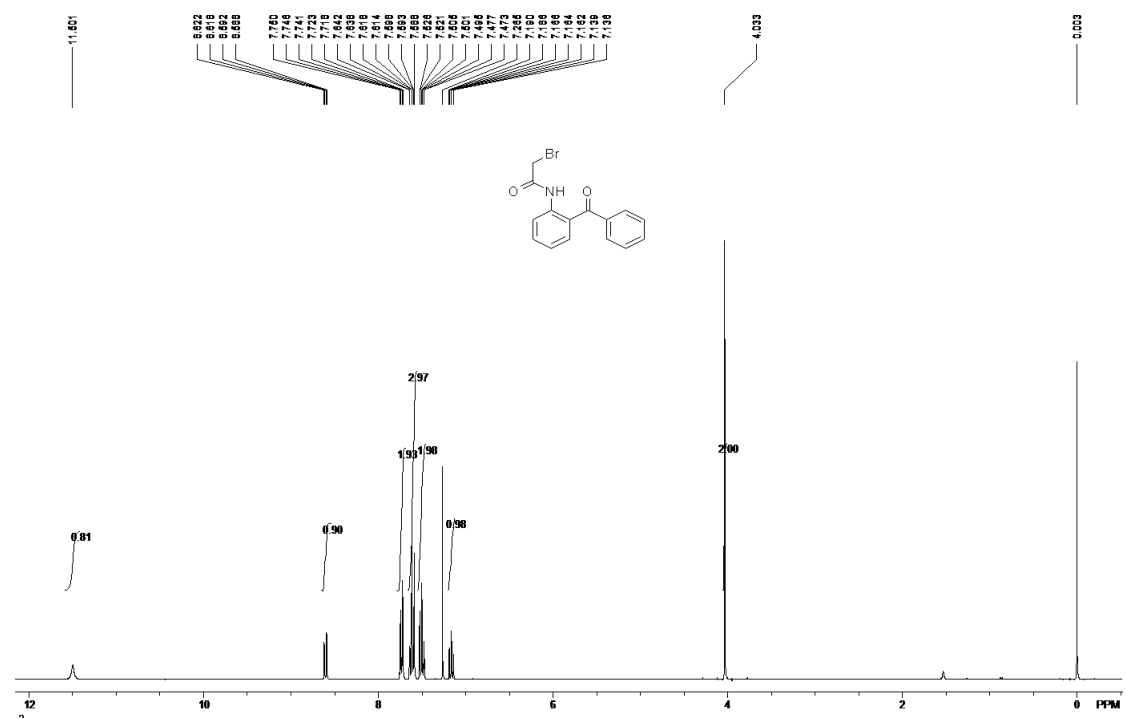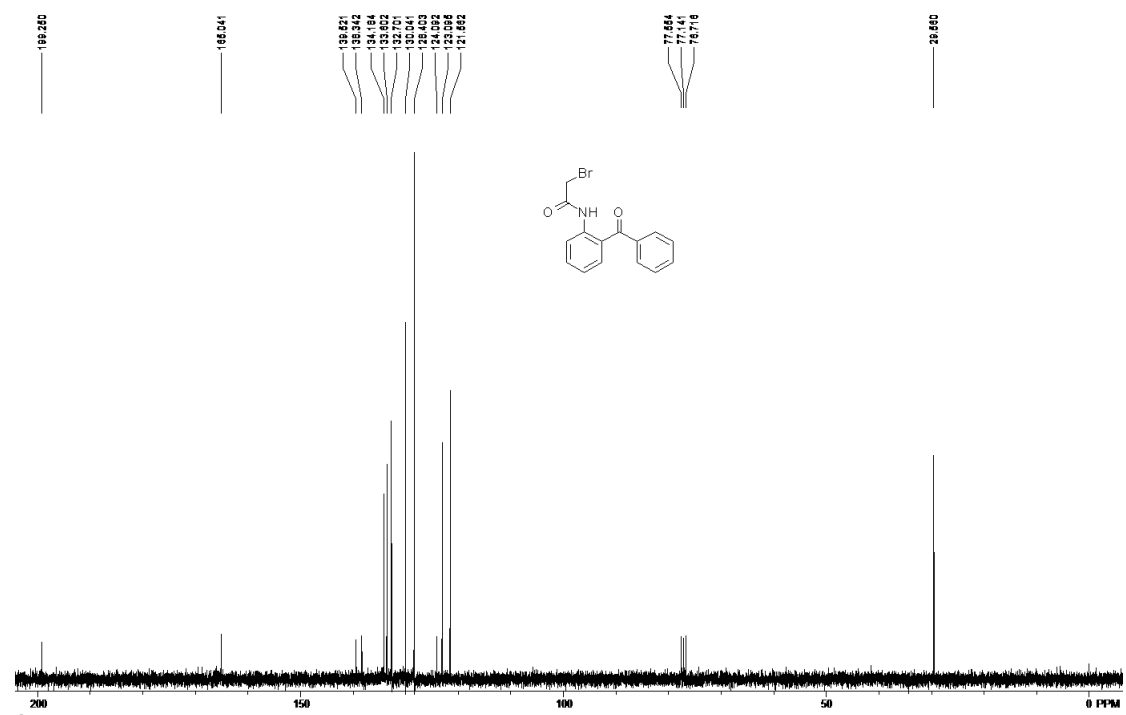

### $^1\text{H}$ and $^{13}\text{C}$ NMR spectra for compound 6

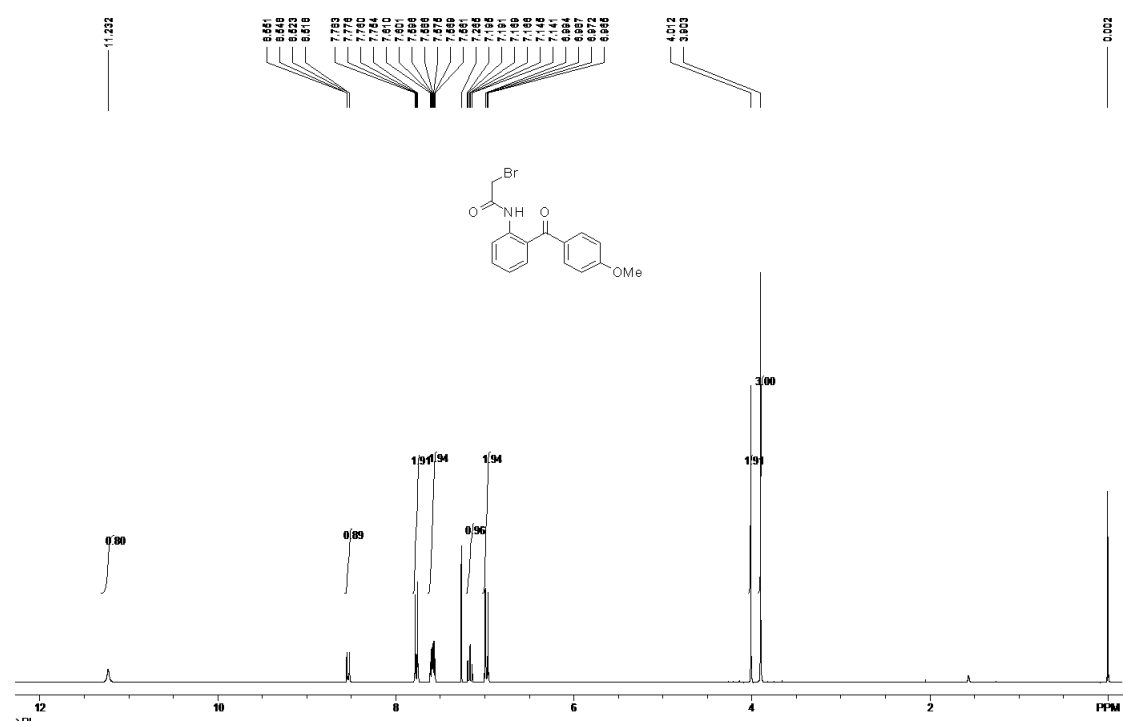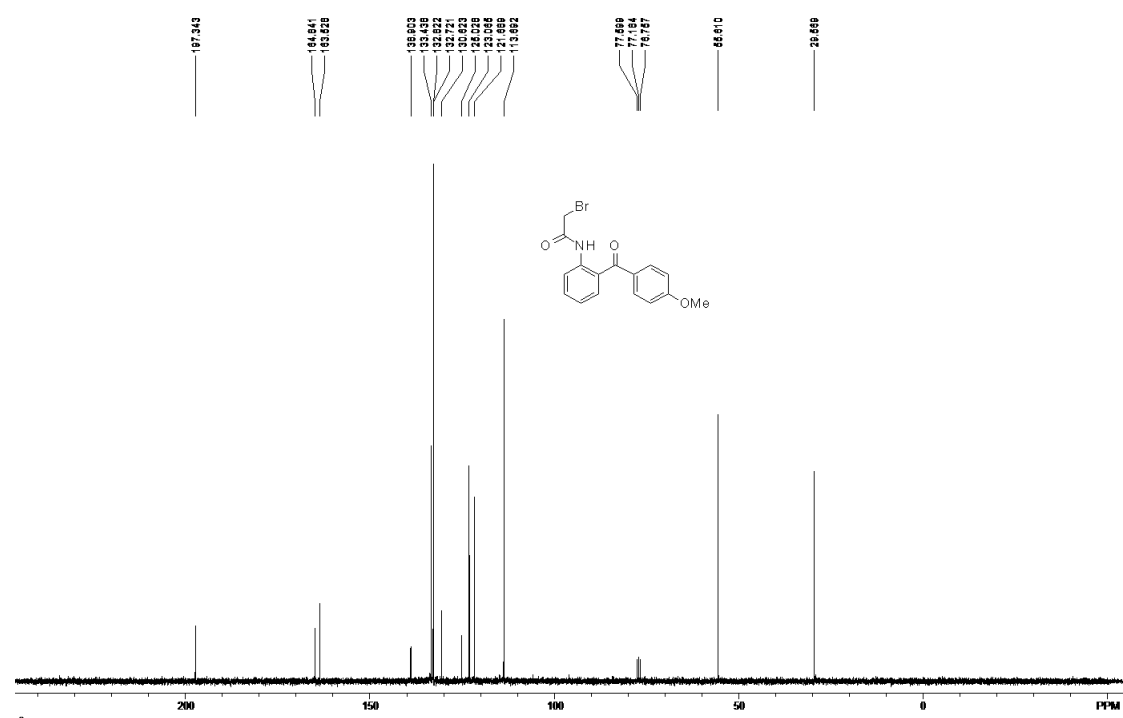

<sup>1</sup>H and <sup>13</sup>C NMR spectra for compound **7**

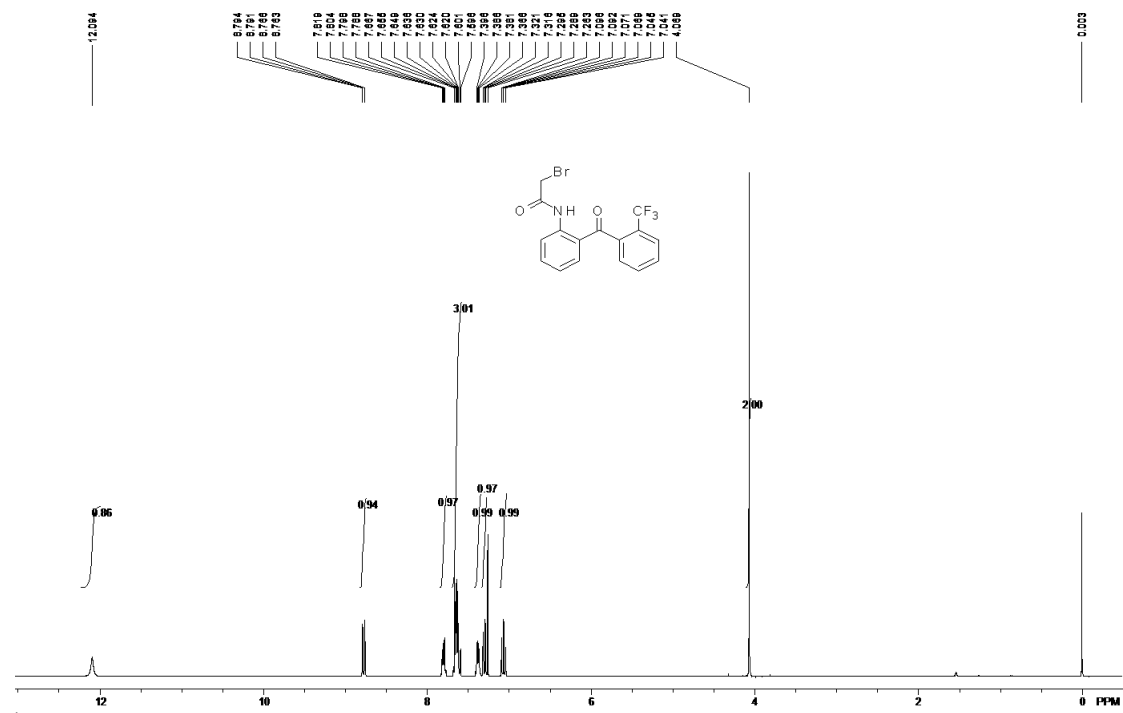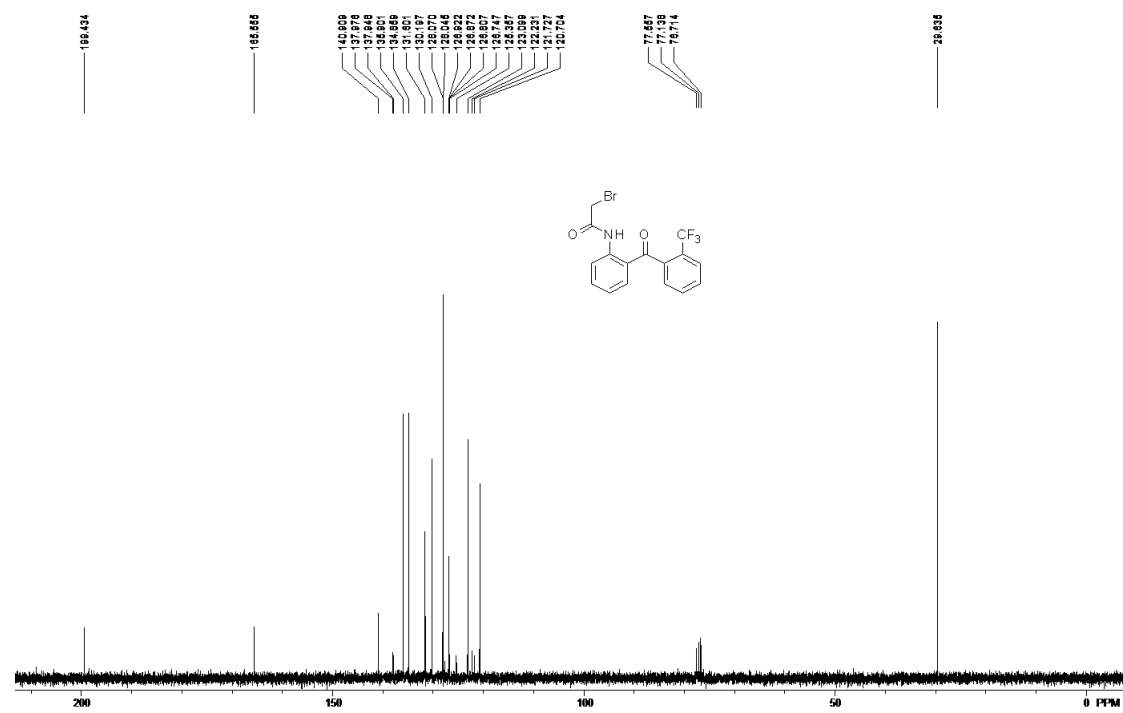

### $^1\text{H}$ and $^{13}\text{C}$ NMR spectra for compound 8

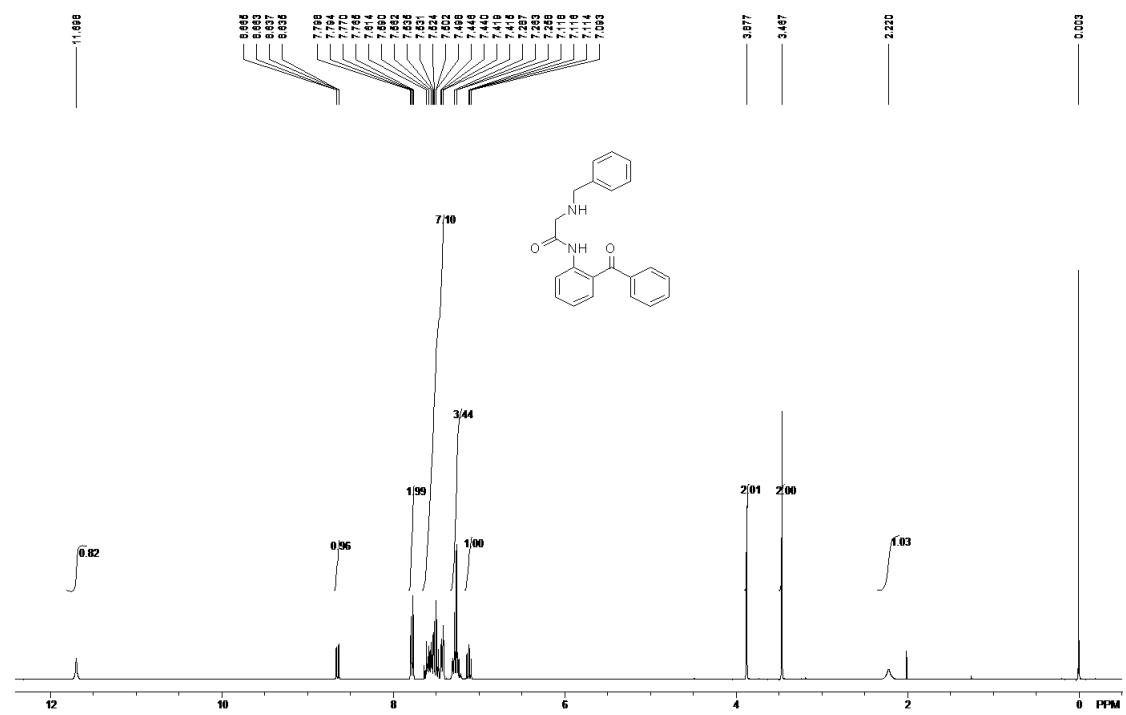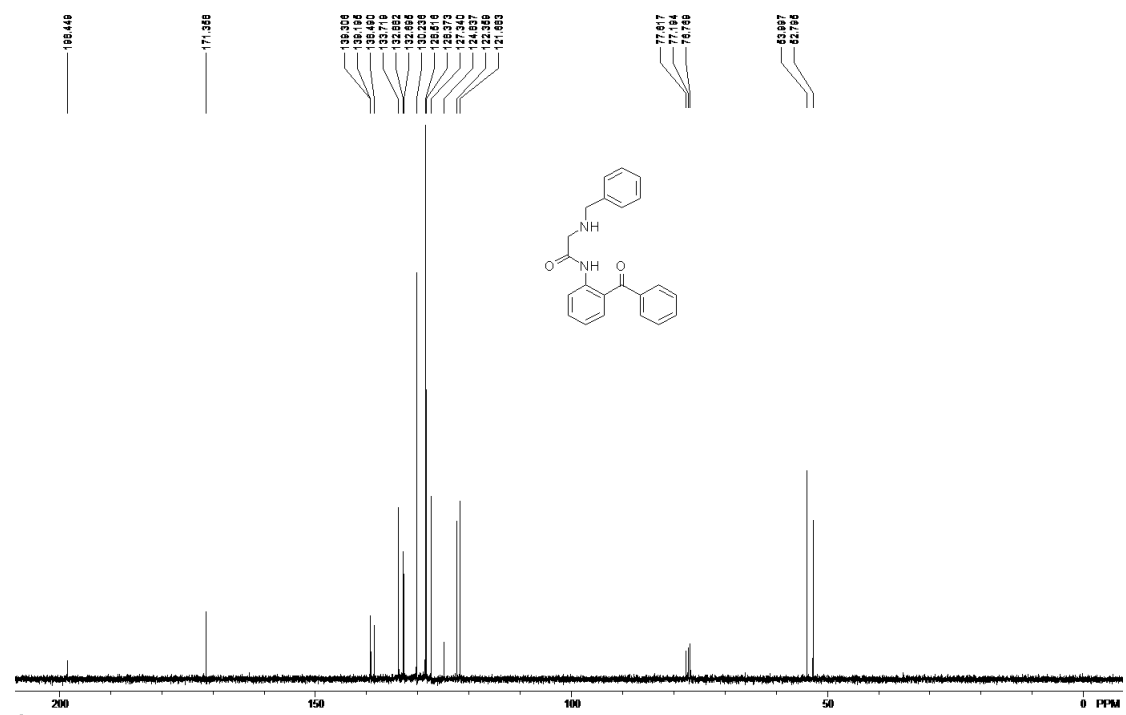

### $^1\text{H}$ and $^{13}\text{C}$ NMR spectra for compound 9

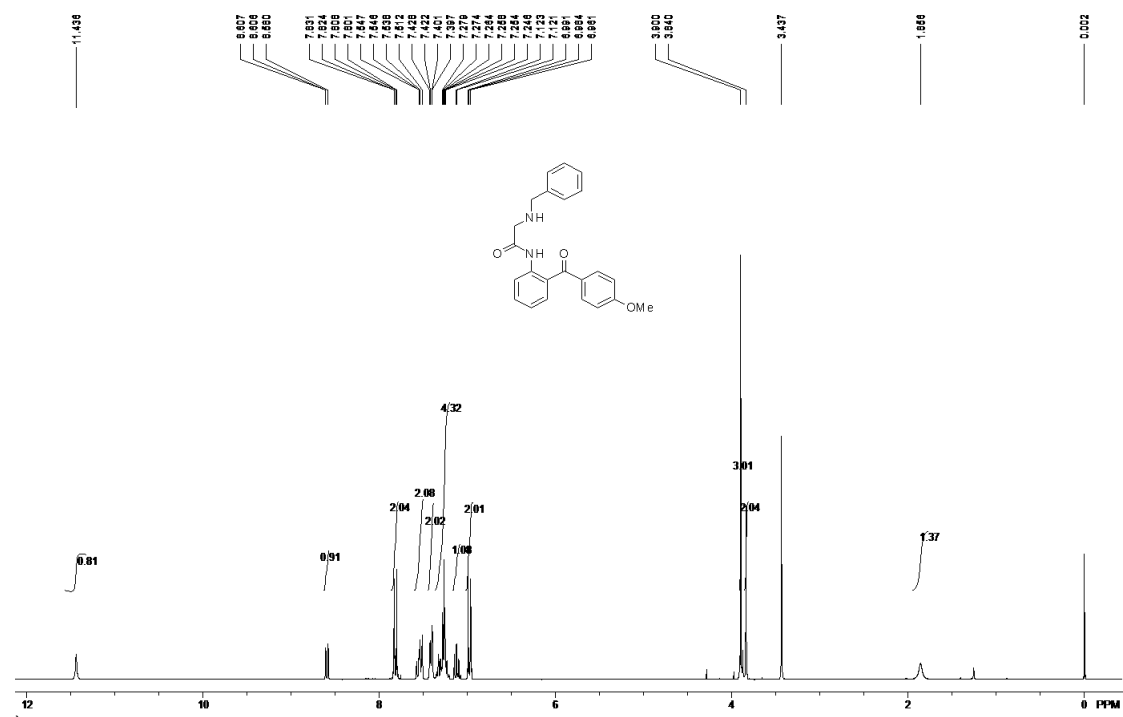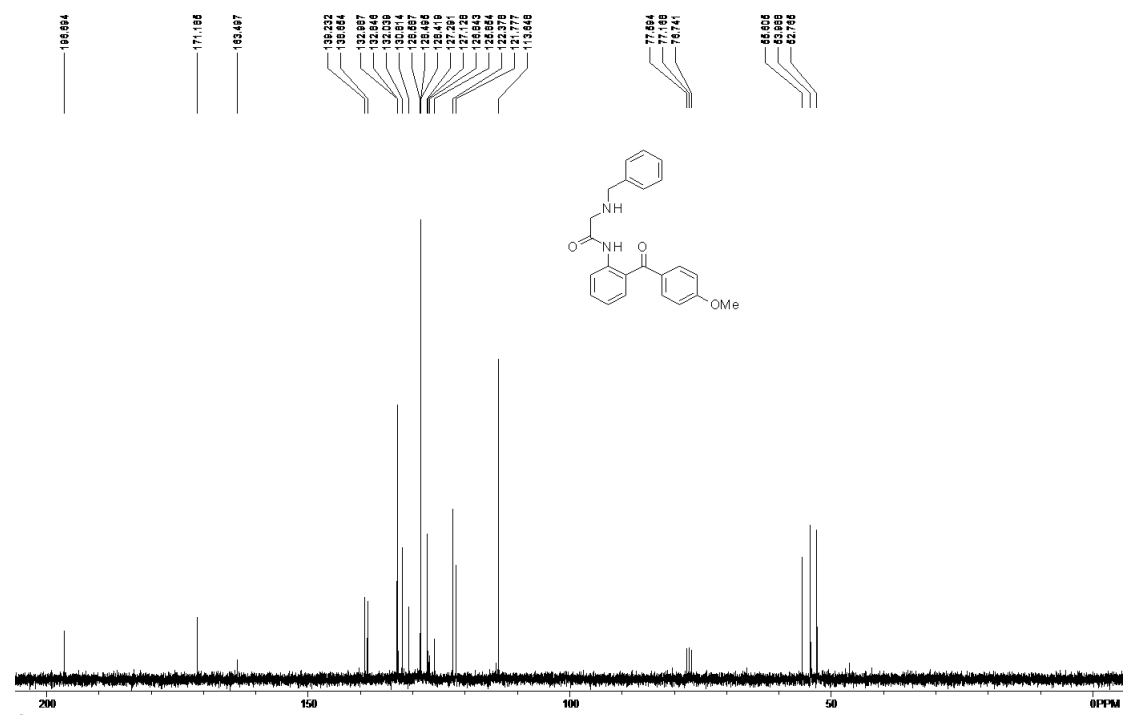

### $^1\text{H}$ and $^{13}\text{C}$ NMR spectra for compound 10

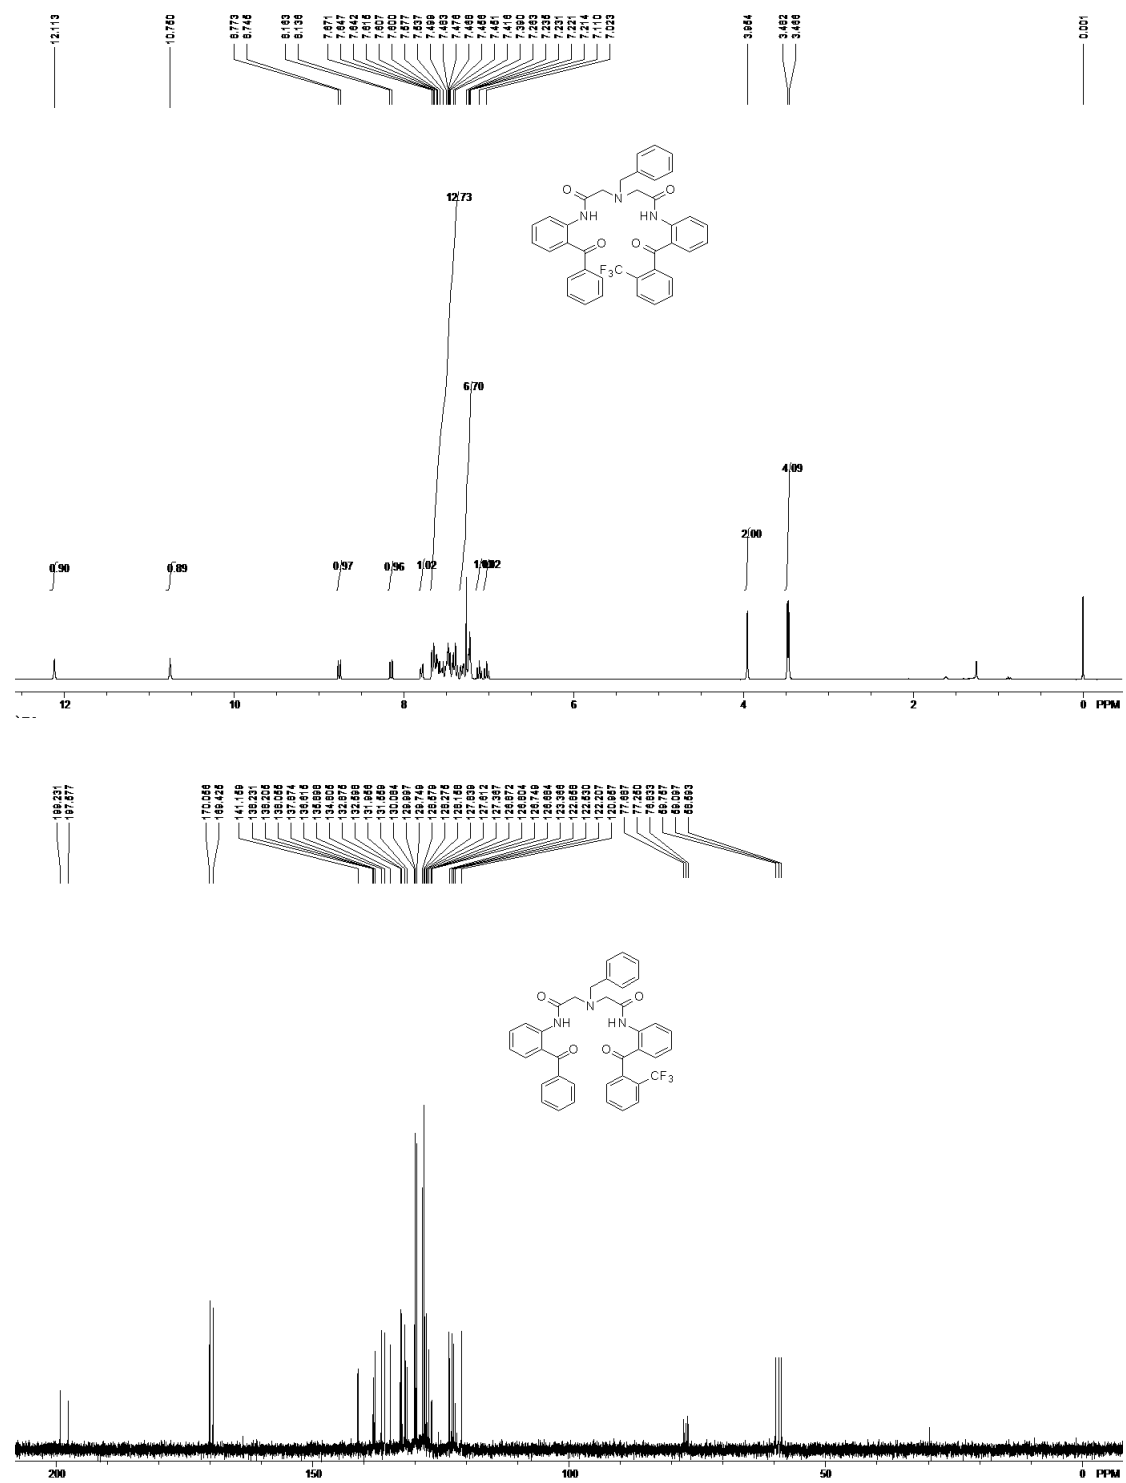

### $^1\text{H}$ and $^{13}\text{C}$ NMR spectra for compound 11

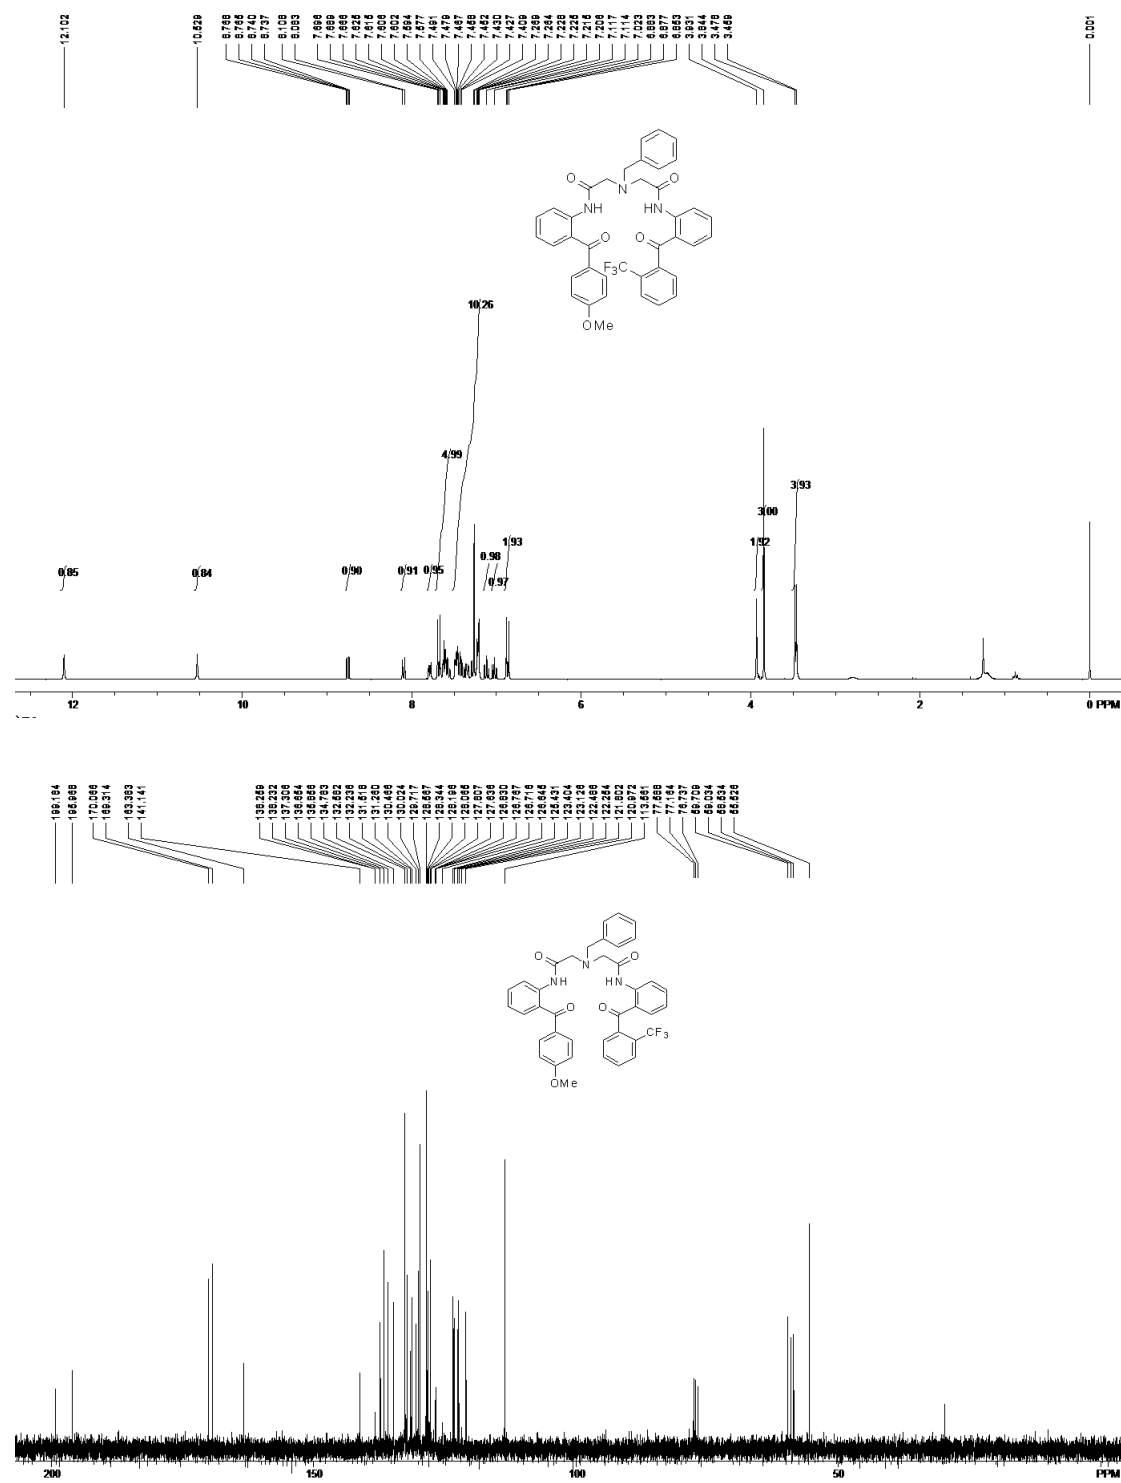



### $^1\text{H}$ and $^{19}\text{F}$ NMR spectra for compound 12

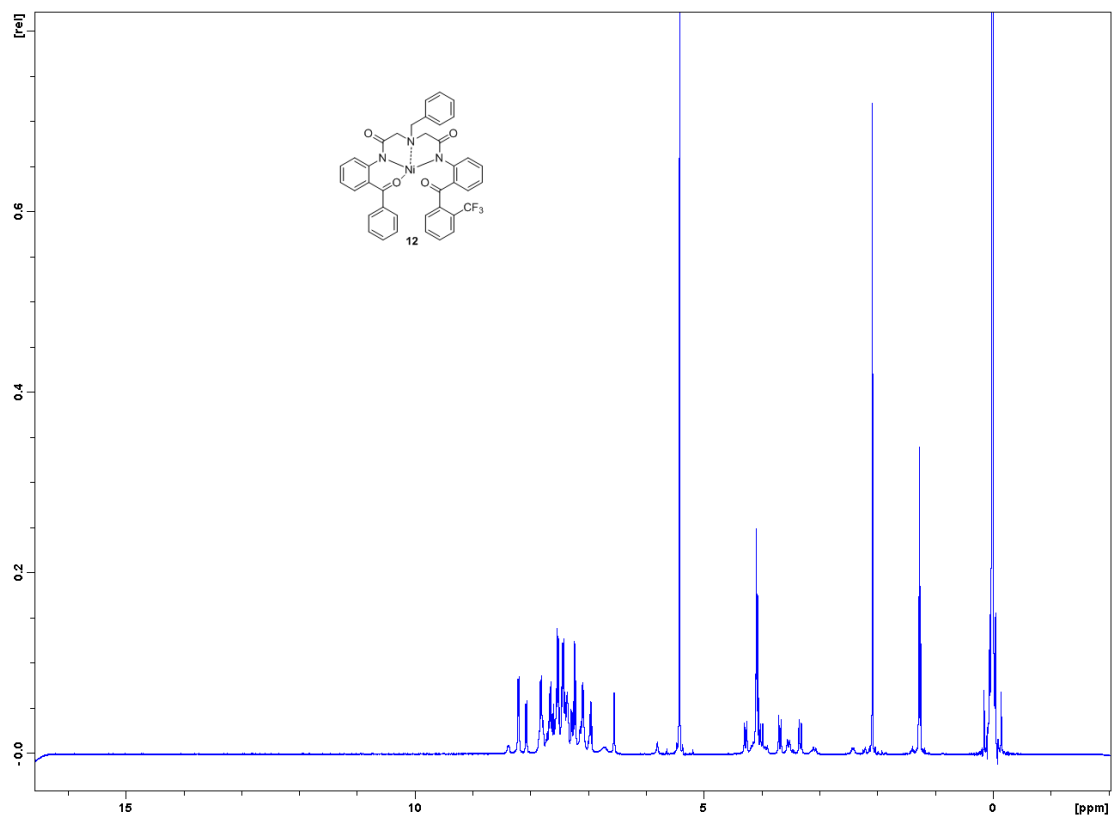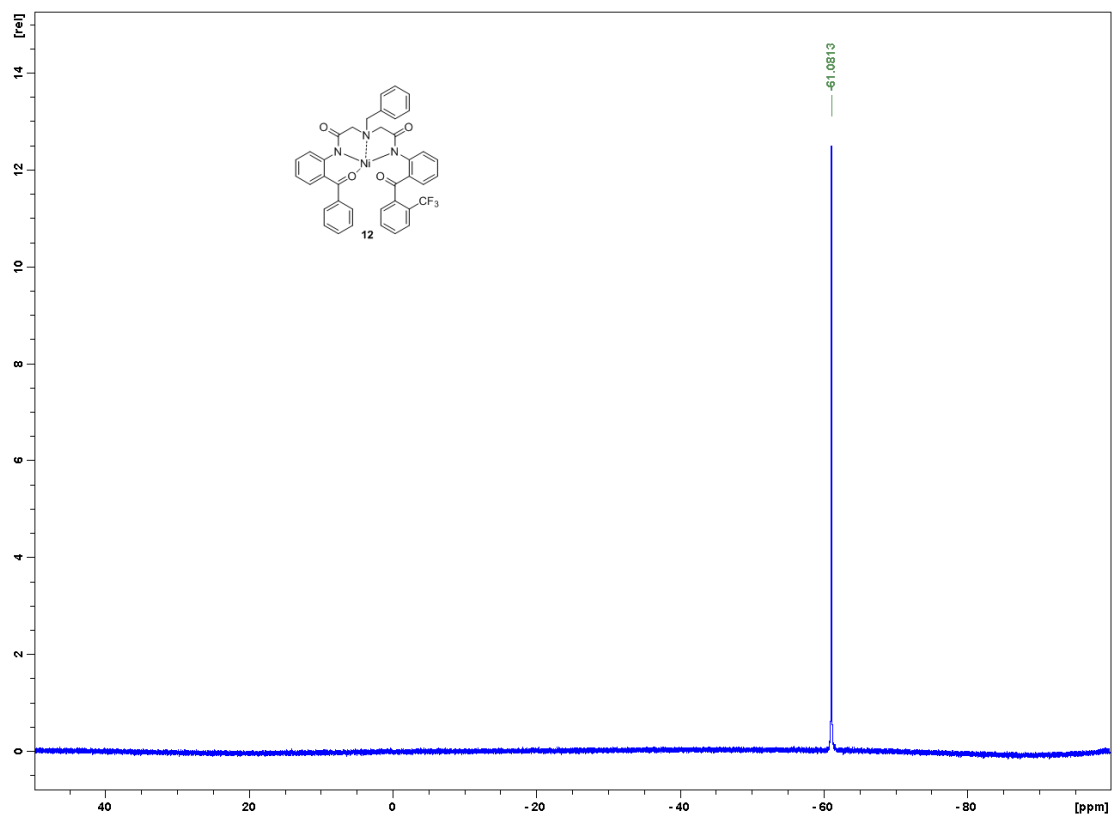

### $^1\text{H}$ and $^{19}\text{F}$ NMR spectra for compound 13

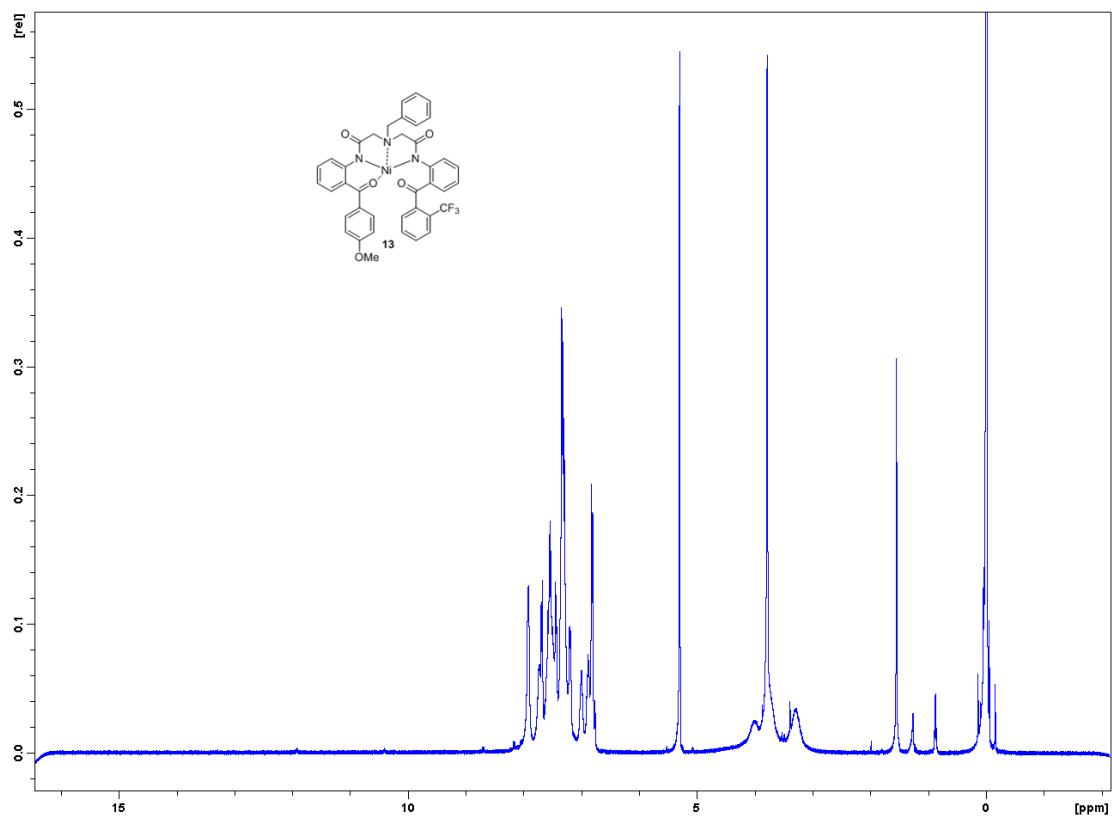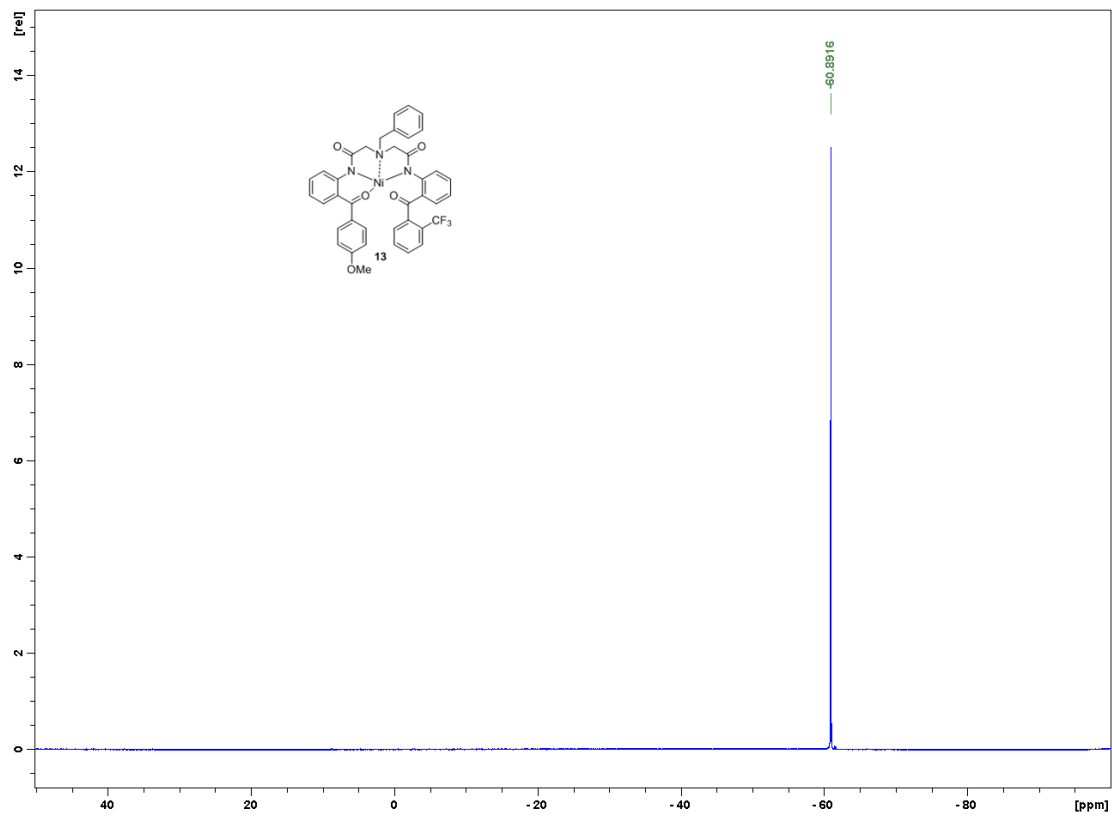

### $^1\text{H}$ and $^{19}\text{F}$ NMR spectra for compound 14

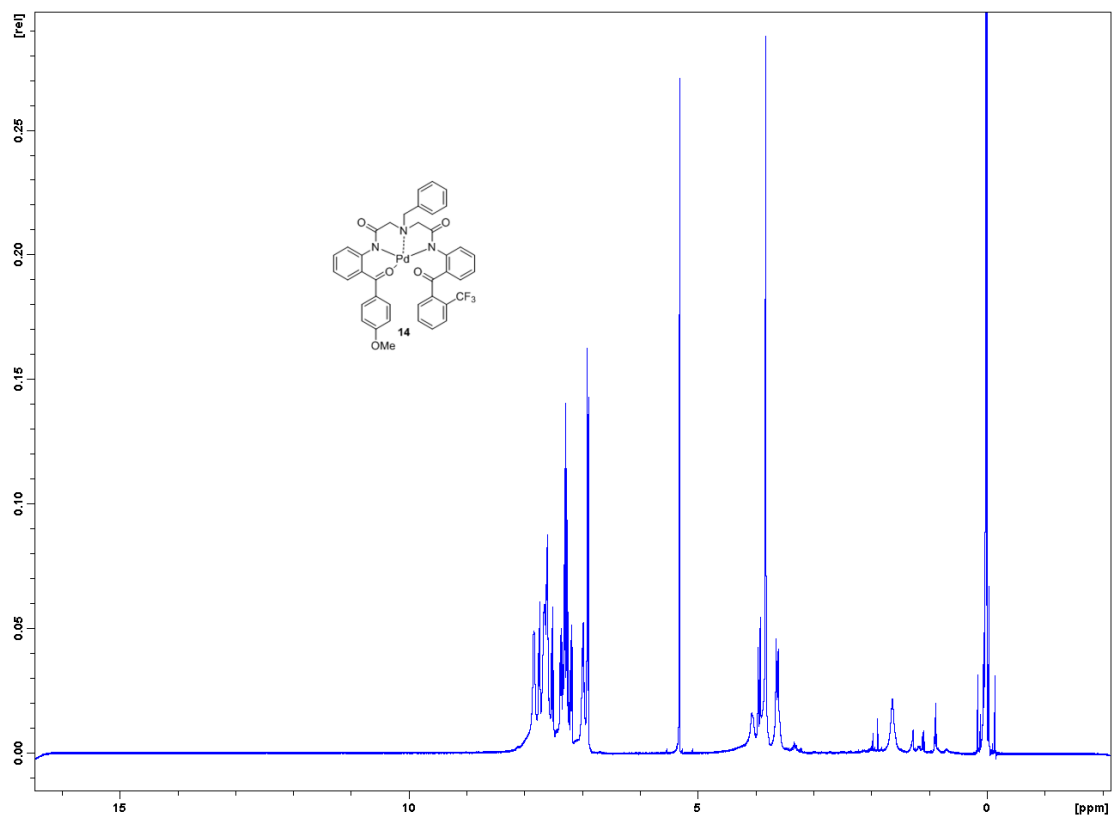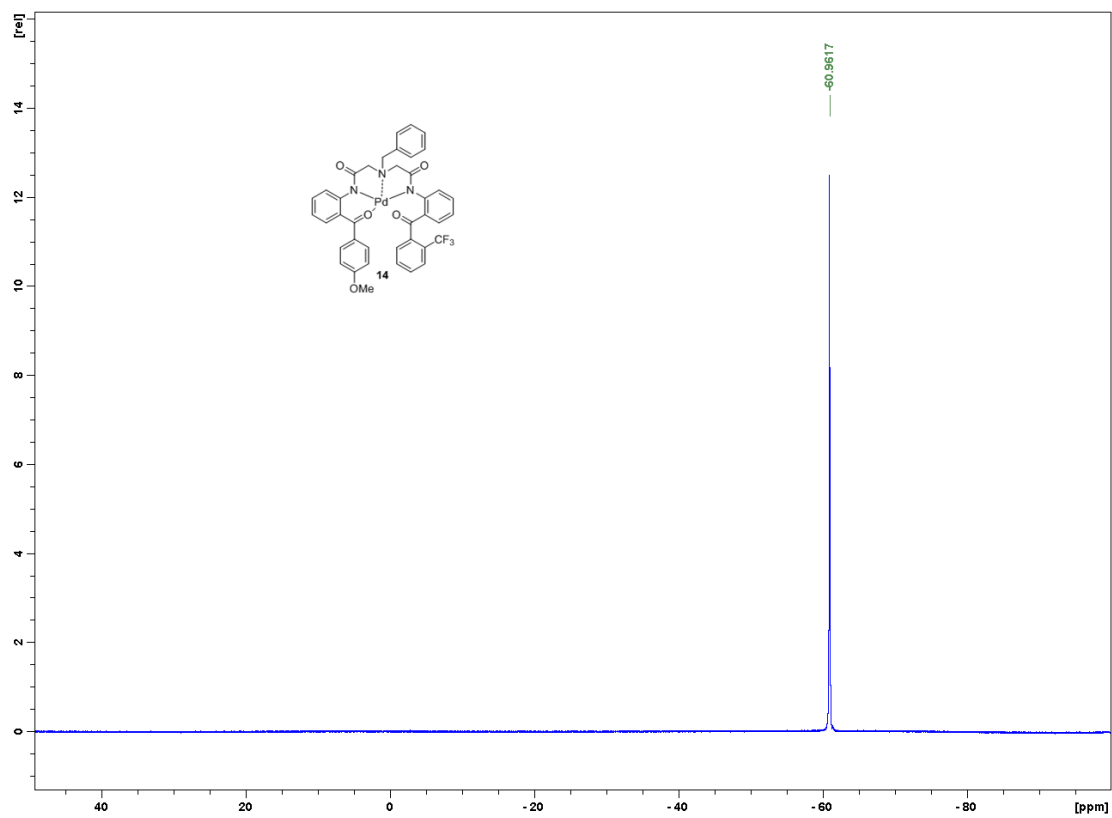

ORTEP drawing of compound 12. (CCDC number 951881)

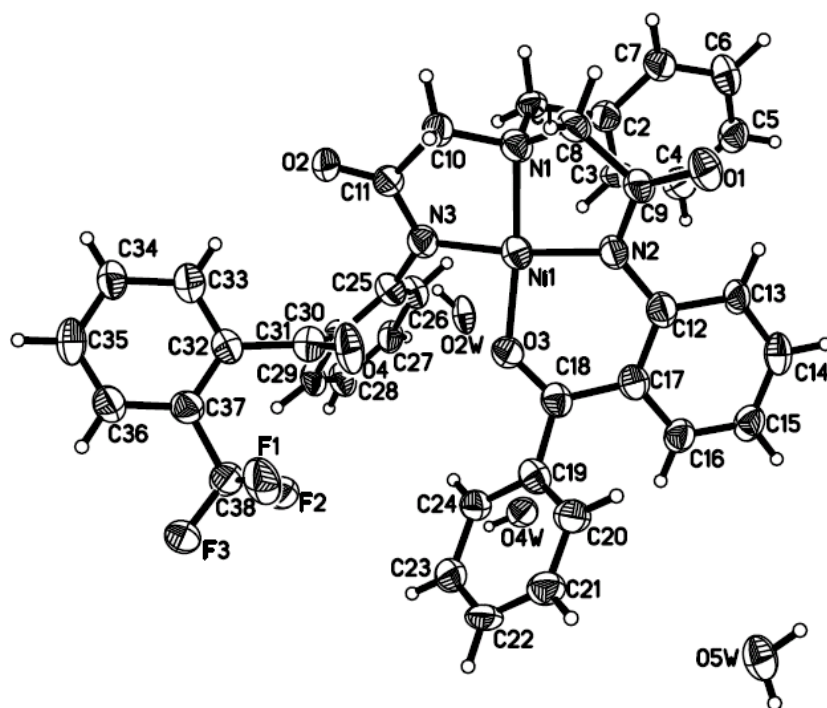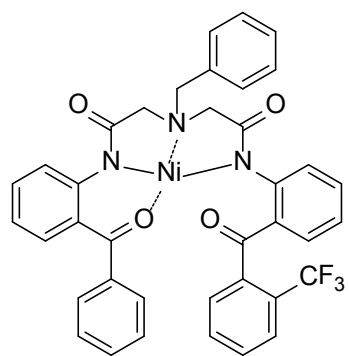

Ni-o-CF<sub>3</sub>-p-H

Table 1. Crystal data and structure refinement for complex **12**.

|                                   |                                                                                                                                        |
|-----------------------------------|----------------------------------------------------------------------------------------------------------------------------------------|
| Identification code               | Ni-o-CF3-p-H                                                                                                                           |
| Empirical formula                 | C <sub>38</sub> H <sub>28</sub> F <sub>3</sub> N <sub>3</sub> Ni O <sub>4</sub>                                                        |
| Formula weight                    | 706.34                                                                                                                                 |
| Temperature                       | 291(2) K                                                                                                                               |
| Wavelength                        | 0.71073 Å                                                                                                                              |
| Crystal system, space group       | Triclinic, P-1                                                                                                                         |
| Unit cell dimensions              | a = 11.869(2) Å    alpha = 74.121(2) deg.<br>b = 11.874(3) Å    beta = 78.329(3) deg.<br>c = 14.3120(18) Å    gamma = 79.1460(10) deg. |
| Volume                            | 1880.9(7) Å <sup>3</sup>                                                                                                               |
| Z, Calculated density             | 2, 1.311 Mg/m <sup>3</sup>                                                                                                             |
| Absorption coefficient            | 0.578 mm <sup>-1</sup>                                                                                                                 |
| F(000)                            | 768                                                                                                                                    |
| Crystal size                      | 0.28 x 0.24 x 0.22 mm                                                                                                                  |
| Theta range for data collection   | 1.80 to 26.00 deg.                                                                                                                     |
| Limiting indices                  | -12 ≤ h ≤ 14, -14 ≤ k ≤ 14, -8 ≤ l ≤ 17                                                                                                |
| Reflections collected / unique    | 10366 / 7258 [R(int) = 0.0266]                                                                                                         |
| Completeness to theta = 26.00     | 98.1 %                                                                                                                                 |
| Absorption correction             | Semi-empirical from equivalents                                                                                                        |
| Max. and min. transmission        | 0.8834 and 0.8549                                                                                                                      |
| Refinement method                 | Full-matrix least-squares on F <sup>2</sup>                                                                                            |
| Data / restraints / parameters    | 7258 / 0 / 484                                                                                                                         |
| Goodness-of-fit on F <sup>2</sup> | 1.039                                                                                                                                  |
| Final R indices [I > 2σ(I)]       | R1 = 0.0572, wR2 = 0.1342                                                                                                              |
| R indices (all data)              | R1 = 0.0735, wR2 = 0.1395                                                                                                              |
| Largest diff. peak and hole       | 0.325 and -0.270 e.Å <sup>-3</sup>                                                                                                     |

Table 2. Atomic coordinates (x 10<sup>4</sup>) and equivalent isotropic displacement parameters (Å<sup>2</sup> x 10<sup>3</sup>) for Ni-o-CF3-p-H.

U(eq) is defined as one third of the trace of the orthogonalized U<sub>ij</sub> tensor.

|      | x        | y       | z       | U(eq) |
|------|----------|---------|---------|-------|
| C(1) | -2061(3) | 4230(3) | 1591(2) | 35(1) |
| C(2) | -2835(3) | 4836(3) | 2362(2) | 37(1) |
| C(3) | -2402(3) | 5577(3) | 2747(2) | 38(1) |
| C(4) | -3103(3) | 6118(3) | 3446(3) | 46(1) |
| C(5) | -4247(3) | 5919(3) | 3758(3) | 43(1) |
| C(6) | -4691(3) | 5201(3) | 3368(3) | 45(1) |
| C(7) | -3979(3) | 4666(3) | 2660(3) | 40(1) |
| C(8) | -2018(3) | 2259(3) | 2744(2) | 37(1) |

|       |          |         |          |       |
|-------|----------|---------|----------|-------|
| C(9)  | -2084(3) | 2429(3) | 3784(2)  | 37(1) |
| C(10) | -611(3)  | 2635(3) | 1186(2)  | 36(1) |
| C(11) | 453(3)   | 3263(3) | 765(2)   | 33(1) |
| C(12) | -1081(3) | 3189(3) | 4730(2)  | 40(1) |
| C(13) | -2059(3) | 3447(3) | 5413(2)  | 38(1) |
| C(14) | -1923(3) | 3804(3) | 6237(3)  | 43(1) |
| C(15) | -820(3)  | 3817(3) | 6432(2)  | 42(1) |
| C(16) | 120(3)   | 3530(3) | 5787(2)  | 40(1) |
| C(17) | 33(3)    | 3204(3) | 4939(2)  | 37(1) |
| C(18) | 1098(3)  | 2941(3) | 4258(2)  | 36(1) |
| C(19) | 2210(3)  | 2430(3) | 4655(3)  | 38(1) |
| C(20) | 2221(3)  | 1513(3) | 5495(3)  | 42(1) |
| C(21) | 3271(3)  | 955(3)  | 5806(3)  | 43(1) |
| C(22) | 4316(3)  | 1371(3) | 5286(3)  | 42(1) |
| C(23) | 4306(3)  | 2257(3) | 4461(3)  | 41(1) |
| C(24) | 3238(3)  | 2818(3) | 4126(2)  | 38(1) |
| C(25) | 1691(3)  | 4339(3) | 1204(3)  | 40(1) |
| C(26) | 1447(3)  | 5546(3) | 1162(3)  | 39(1) |
| C(27) | 2333(3)  | 6235(3) | 999(2)   | 40(1) |
| C(28) | 3478(3)  | 5709(3) | 869(3)   | 43(1) |
| C(29) | 3743(3)  | 4517(3) | 862(2)   | 36(1) |
| C(30) | 2865(3)  | 3818(3) | 1057(2)  | 34(1) |
| C(31) | 3207(3)  | 2530(3) | 1191(2)  | 38(1) |
| C(32) | 4125(3)  | 2127(3) | 409(2)   | 36(1) |
| C(33) | 3835(3)  | 2400(3) | -537(3)  | 45(1) |
| C(34) | 4629(3)  | 2012(3) | -1291(3) | 41(1) |
| C(35) | 5712(3)  | 1350(3) | -1088(3) | 48(1) |
| C(36) | 5974(3)  | 1114(3) | -173(3)  | 44(1) |
| C(37) | 5200(3)  | 1477(3) | 584(3)   | 39(1) |
| C(38) | 5562(3)  | 1226(3) | 1572(3)  | 44(1) |
| F(1)  | 5046(2)  | 330(2)  | 2253(2)  | 57(1) |
| F(2)  | 5248(2)  | 2112(2) | 2005(2)  | 46(1) |
| F(3)  | 6679(2)  | 938(2)  | 1555(2)  | 49(1) |
| N(1)  | -1317(2) | 3118(2) | 2014(2)  | 37(1) |
| N(2)  | -1172(2) | 2912(2) | 3856(2)  | 36(1) |
| N(3)  | 752(2)   | 3684(2) | 1441(2)  | 39(1) |
| Ni(1) | -151(1)  | 3297(1) | 2698(1)  | 37(1) |
| O(1)  | -2863(2) | 2035(2) | 4448(2)  | 45(1) |
| O(2)  | 959(2)   | 3299(2) | -71(2)   | 38(1) |
| O(3)  | 1093(2)  | 3094(2) | 3339(2)  | 39(1) |
| O(4)  | 2767(2)  | 1823(2) | 1891(2)  | 53(1) |
| O(1W) | 9867(5)  | 548(5)  | 7555(5)  | 47(2) |
| O(2W) | 1089(5)  | 8975(5) | 1055(5)  | 48(2) |
| O(3W) | 10000    | 0       | 5000     | 46(1) |

|       |         |         |         |       |
|-------|---------|---------|---------|-------|
| O(4W) | 3131(6) | 9255(6) | 3544(5) | 54(2) |
| O(5W) | 1776(6) | 1562(5) | 8463(5) | 51(2) |

---

Table 3. Bond lengths [Å] and angles [deg] for Ni-o-CF3-p-H.

---

|              |          |
|--------------|----------|
| C(1)-N(1)    | 1.493(4) |
| C(1)-C(2)    | 1.534(4) |
| C(1)-H(1A)   | 0.9700   |
| C(1)-H(1B)   | 0.9700   |
| C(2)-C(7)    | 1.374(5) |
| C(2)-C(3)    | 1.376(5) |
| C(3)-C(4)    | 1.385(5) |
| C(3)-H(3)    | 0.9300   |
| C(4)-C(5)    | 1.383(5) |
| C(4)-H(4)    | 0.9300   |
| C(5)-C(6)    | 1.365(5) |
| C(5)-H(5)    | 0.9300   |
| C(6)-C(7)    | 1.395(5) |
| C(6)-H(6)    | 0.9300   |
| C(7)-H(7)    | 0.9300   |
| C(8)-N(1)    | 1.487(4) |
| C(8)-C(9)    | 1.542(5) |
| C(8)-H(8A)   | 0.9700   |
| C(8)-H(8B)   | 0.9700   |
| C(9)-O(1)    | 1.241(4) |
| C(9)-N(2)    | 1.350(4) |
| C(10)-N(1)   | 1.492(4) |
| C(10)-C(11)  | 1.521(4) |
| C(10)-H(10A) | 0.9700   |
| C(10)-H(10B) | 0.9700   |
| C(11)-O(2)   | 1.219(4) |
| C(11)-N(3)   | 1.335(4) |
| C(12)-C(13)  | 1.402(4) |
| C(12)-N(2)   | 1.406(4) |
| C(12)-C(17)  | 1.419(5) |
| C(13)-C(14)  | 1.405(5) |
| C(13)-H(13)  | 0.9300   |
| C(14)-C(15)  | 1.396(5) |
| C(14)-H(14)  | 0.9300   |
| C(15)-C(16)  | 1.352(5) |
| C(15)-H(15)  | 0.9300   |
| C(16)-C(17)  | 1.398(5) |

|             |          |
|-------------|----------|
| C(16)-H(16) | 0.9300   |
| C(17)-C(18) | 1.471(4) |
| C(18)-O(3)  | 1.279(4) |
| C(18)-C(19) | 1.499(5) |
| C(19)-C(20) | 1.384(5) |
| C(19)-C(24) | 1.386(5) |
| C(20)-C(21) | 1.394(5) |
| C(20)-H(20) | 0.9300   |
| C(21)-C(22) | 1.412(5) |
| C(21)-H(21) | 0.9300   |
| C(22)-C(23) | 1.350(5) |
| C(22)-H(22) | 0.9300   |
| C(23)-C(24) | 1.426(5) |
| C(23)-H(23) | 0.9300   |
| C(24)-H(24) | 0.9300   |
| C(25)-C(26) | 1.395(5) |
| C(25)-N(3)  | 1.411(4) |
| C(25)-C(30) | 1.413(5) |
| C(26)-C(27) | 1.397(5) |
| C(26)-H(26) | 0.9300   |
| C(27)-C(28) | 1.383(5) |
| C(27)-H(27) | 0.9300   |
| C(28)-C(29) | 1.394(5) |
| C(28)-H(28) | 0.9300   |
| C(29)-C(30) | 1.390(4) |
| C(29)-H(29) | 0.9300   |
| C(30)-C(31) | 1.476(4) |
| C(31)-O(4)  | 1.214(4) |
| C(31)-C(32) | 1.507(5) |
| C(32)-C(37) | 1.392(5) |
| C(32)-C(33) | 1.402(5) |
| C(33)-C(34) | 1.400(5) |
| C(33)-H(33) | 0.9300   |
| C(34)-C(35) | 1.414(5) |
| C(34)-H(34) | 0.9300   |
| C(35)-C(36) | 1.350(5) |
| C(35)-H(35) | 0.9300   |
| C(36)-C(37) | 1.381(5) |
| C(36)-H(36) | 0.9300   |
| C(37)-C(38) | 1.497(5) |
| C(38)-F(3)  | 1.302(4) |
| C(38)-F(2)  | 1.321(4) |
| C(38)-F(1)  | 1.376(4) |
| N(1)-Ni(1)  | 1.921(3) |



|                  |          |
|------------------|----------|
| N(2)-Ni(1)       | 1.846(3) |
| N(3)-Ni(1)       | 1.884(3) |
| Ni(1)-O(3)       | 1.836(2) |
| O(1W)-H(1WD)     | 0.8499   |
| O(1W)-H(1WB)     | 0.8500   |
| O(2W)-H(2WA)     | 0.8500   |
| O(2W)-H(2WB)     | 0.8499   |
| O(3W)-H(3WA)     | 0.8500   |
| O(3W)-H(3WB)     | 0.8500   |
| O(4W)-H(4WA)     | 0.8500   |
| O(4W)-H(4WB)     | 0.8500   |
| O(5W)-H(5WA)     | 0.8499   |
| O(5W)-H(5WB)     | 0.8500   |
| N(1)-C(1)-C(2)   | 114.3(3) |
| N(1)-C(1)-H(1A)  | 108.7    |
| C(2)-C(1)-H(1A)  | 108.7    |
| N(1)-C(1)-H(1B)  | 108.7    |
| C(2)-C(1)-H(1B)  | 108.7    |
| H(1A)-C(1)-H(1B) | 107.6    |
| C(7)-C(2)-C(3)   | 119.1(3) |
| C(7)-C(2)-C(1)   | 120.4(3) |
| C(3)-C(2)-C(1)   | 120.5(3) |
| C(2)-C(3)-C(4)   | 120.3(3) |
| C(2)-C(3)-H(3)   | 119.8    |
| C(4)-C(3)-H(3)   | 119.8    |
| C(5)-C(4)-C(3)   | 120.1(3) |
| C(5)-C(4)-H(4)   | 119.9    |
| C(3)-C(4)-H(4)   | 119.9    |
| C(6)-C(5)-C(4)   | 120.1(3) |
| C(6)-C(5)-H(5)   | 120.0    |
| C(4)-C(5)-H(5)   | 120.0    |
| C(5)-C(6)-C(7)   | 119.4(3) |
| C(5)-C(6)-H(6)   | 120.3    |
| C(7)-C(6)-H(6)   | 120.3    |
| C(2)-C(7)-C(6)   | 121.0(3) |
| C(2)-C(7)-H(7)   | 119.5    |
| C(6)-C(7)-H(7)   | 119.5    |
| N(1)-C(8)-C(9)   | 109.7(3) |
| N(1)-C(8)-H(8A)  | 109.7    |
| C(9)-C(8)-H(8A)  | 109.7    |
| N(1)-C(8)-H(8B)  | 109.7    |
| C(9)-C(8)-H(8B)  | 109.7    |
| H(8A)-C(8)-H(8B) | 108.2    |
| O(1)-C(9)-N(2)   | 128.5(3) |

|                     |          |
|---------------------|----------|
| O(1)-C(9)-C(8)      | 119.1(3) |
| N(2)-C(9)-C(8)      | 112.1(3) |
| N(1)-C(10)-C(11)    | 109.9(2) |
| N(1)-C(10)-H(10A)   | 109.7    |
| C(11)-C(10)-H(10A)  | 109.7    |
| N(1)-C(10)-H(10B)   | 109.7    |
| C(11)-C(10)-H(10B)  | 109.7    |
| H(10A)-C(10)-H(10B) | 108.2    |
| O(2)-C(11)-N(3)     | 127.2(3) |
| O(2)-C(11)-C(10)    | 121.8(3) |
| N(3)-C(11)-C(10)    | 110.9(3) |
| C(13)-C(12)-N(2)    | 122.3(3) |
| C(13)-C(12)-C(17)   | 118.4(3) |
| N(2)-C(12)-C(17)    | 119.4(3) |
| C(12)-C(13)-C(14)   | 119.8(3) |
| C(12)-C(13)-H(13)   | 120.1    |
| C(14)-C(13)-H(13)   | 120.1    |
| C(15)-C(14)-C(13)   | 121.1(3) |
| C(15)-C(14)-H(14)   | 119.5    |
| C(13)-C(14)-H(14)   | 119.5    |
| C(16)-C(15)-C(14)   | 118.6(3) |
| C(16)-C(15)-H(15)   | 120.7    |
| C(14)-C(15)-H(15)   | 120.7    |
| C(15)-C(16)-C(17)   | 122.6(3) |
| C(15)-C(16)-H(16)   | 118.7    |
| C(17)-C(16)-H(16)   | 118.7    |
| C(16)-C(17)-C(12)   | 119.3(3) |
| C(16)-C(17)-C(18)   | 119.2(3) |
| C(12)-C(17)-C(18)   | 121.4(3) |
| O(3)-C(18)-C(17)    | 121.8(3) |
| O(3)-C(18)-C(19)    | 118.9(3) |
| C(17)-C(18)-C(19)   | 119.3(3) |
| C(20)-C(19)-C(24)   | 120.5(3) |
| C(20)-C(19)-C(18)   | 120.2(3) |
| C(24)-C(19)-C(18)   | 119.1(3) |
| C(19)-C(20)-C(21)   | 120.2(3) |
| C(19)-C(20)-H(20)   | 119.9    |
| C(21)-C(20)-H(20)   | 119.9    |
| C(20)-C(21)-C(22)   | 119.4(3) |
| C(20)-C(21)-H(21)   | 120.3    |
| C(22)-C(21)-H(21)   | 120.3    |
| C(23)-C(22)-C(21)   | 120.3(3) |
| C(23)-C(22)-H(22)   | 119.9    |
| C(21)-C(22)-H(22)   | 119.9    |

|                   |          |
|-------------------|----------|
| C(22)-C(23)-C(24) | 120.6(3) |
| C(22)-C(23)-H(23) | 119.7    |
| C(24)-C(23)-H(23) | 119.7    |
| C(19)-C(24)-C(23) | 119.0(3) |
| C(19)-C(24)-H(24) | 120.5    |
| C(23)-C(24)-H(24) | 120.5    |
| C(26)-C(25)-N(3)  | 118.2(3) |
| C(26)-C(25)-C(30) | 118.6(3) |
| N(3)-C(25)-C(30)  | 123.1(3) |
| C(25)-C(26)-C(27) | 121.5(3) |
| C(25)-C(26)-H(26) | 119.3    |
| C(27)-C(26)-H(26) | 119.3    |
| C(28)-C(27)-C(26) | 119.2(3) |
| C(28)-C(27)-H(27) | 120.4    |
| C(26)-C(27)-H(27) | 120.4    |
| C(27)-C(28)-C(29) | 120.4(3) |
| C(27)-C(28)-H(28) | 119.8    |
| C(29)-C(28)-H(28) | 119.8    |
| C(30)-C(29)-C(28) | 120.6(3) |
| C(30)-C(29)-H(29) | 119.7    |
| C(28)-C(29)-H(29) | 119.7    |
| C(29)-C(30)-C(25) | 119.7(3) |
| C(29)-C(30)-C(31) | 117.9(3) |
| C(25)-C(30)-C(31) | 122.3(3) |
| O(4)-C(31)-C(30)  | 121.9(3) |
| O(4)-C(31)-C(32)  | 121.2(3) |
| C(30)-C(31)-C(32) | 116.8(3) |
| C(37)-C(32)-C(33) | 119.5(3) |
| C(37)-C(32)-C(31) | 124.1(3) |
| C(33)-C(32)-C(31) | 116.4(3) |
| C(34)-C(33)-C(32) | 119.5(3) |
| C(34)-C(33)-H(33) | 120.3    |
| C(32)-C(33)-H(33) | 120.3    |
| C(33)-C(34)-C(35) | 119.7(3) |
| C(33)-C(34)-H(34) | 120.1    |
| C(35)-C(34)-H(34) | 120.1    |
| C(36)-C(35)-C(34) | 119.5(3) |
| C(36)-C(35)-H(35) | 120.2    |
| C(34)-C(35)-H(35) | 120.2    |
| C(35)-C(36)-C(37) | 121.8(3) |
| C(35)-C(36)-H(36) | 119.1    |
| C(37)-C(36)-H(36) | 119.1    |
| C(36)-C(37)-C(32) | 120.0(3) |
| C(36)-C(37)-C(38) | 119.1(3) |

|                     |            |
|---------------------|------------|
| C(32)-C(37)-C(38)   | 120.7(3)   |
| F(3)-C(38)-F(2)     | 106.2(3)   |
| F(3)-C(38)-F(1)     | 106.8(3)   |
| F(2)-C(38)-F(1)     | 102.2(3)   |
| F(3)-C(38)-C(37)    | 113.6(3)   |
| F(2)-C(38)-C(37)    | 114.2(3)   |
| F(1)-C(38)-C(37)    | 112.8(3)   |
| C(8)-N(1)-C(10)     | 113.3(3)   |
| C(8)-N(1)-C(1)      | 111.7(3)   |
| C(10)-N(1)-C(1)     | 108.4(3)   |
| C(8)-N(1)-Ni(1)     | 104.8(2)   |
| C(10)-N(1)-Ni(1)    | 102.63(19) |
| C(1)-N(1)-Ni(1)     | 115.8(2)   |
| C(9)-N(2)-C(12)     | 121.6(3)   |
| C(9)-N(2)-Ni(1)     | 114.7(2)   |
| C(12)-N(2)-Ni(1)    | 123.5(2)   |
| C(11)-N(3)-C(25)    | 120.8(3)   |
| C(11)-N(3)-Ni(1)    | 114.5(2)   |
| C(25)-N(3)-Ni(1)    | 124.6(2)   |
| O(3)-Ni(1)-N(2)     | 93.10(11)  |
| O(3)-Ni(1)-N(3)     | 93.42(11)  |
| N(2)-Ni(1)-N(3)     | 173.40(12) |
| O(3)-Ni(1)-N(1)     | 166.05(11) |
| N(2)-Ni(1)-N(1)     | 88.05(12)  |
| N(3)-Ni(1)-N(1)     | 85.37(12)  |
| C(18)-O(3)-Ni(1)    | 128.8(2)   |
| H(1WD)-O(1W)-H(1WB) | 109.5      |
| H(2WA)-O(2W)-H(2WB) | 109.5      |
| H(3WA)-O(3W)-H(3WB) | 109.5      |
| H(4WA)-O(4W)-H(4WB) | 109.5      |
| H(5WA)-O(5W)-H(5WB) | 109.5      |

---

Symmetry transformations used to generate equivalent atoms:

Table 4. Anisotropic displacement parameters ( $\text{\AA}^2 \times 10^3$ ) for Ni-o-CF<sub>3</sub>-p-H.

The anisotropic displacement factor exponent takes the form:

$$-2 \pi^2 [ h^2 a^{*2} U_{11} + \dots + 2 h k a^* b^* U_{12} ]$$

---

|      | U11   | U22   | U33   | U23    | U13    | U12   |
|------|-------|-------|-------|--------|--------|-------|
| C(1) | 32(2) | 41(2) | 32(2) | -12(1) | -12(1) | 3(1)  |
| C(2) | 33(2) | 41(2) | 34(2) | -7(1)  | -6(1)  | -1(1) |
| C(3) | 36(2) | 45(2) | 40(2) | -15(2) | -16(1) | -3(1) |

---

|       |       |       |       |        |        |        |
|-------|-------|-------|-------|--------|--------|--------|
| C(4)  | 43(2) | 47(2) | 49(2) | -19(2) | -13(2) | 9(2)   |
| C(5)  | 40(2) | 46(2) | 40(2) | -15(2) | -4(2)  | 5(2)   |
| C(6)  | 36(2) | 39(2) | 53(2) | -14(2) | 9(2)   | -4(1)  |
| C(7)  | 39(2) | 43(2) | 42(2) | -14(2) | -2(2)  | -13(1) |
| C(8)  | 29(2) | 45(2) | 37(2) | -6(1)  | -4(1)  | -13(1) |
| C(9)  | 32(2) | 45(2) | 32(2) | -2(1)  | -1(1)  | -15(1) |
| C(10) | 34(2) | 40(2) | 38(2) | -15(1) | -2(1)  | -5(1)  |
| C(11) | 32(2) | 34(2) | 34(2) | -9(1)  | -5(1)  | -4(1)  |
| C(12) | 34(2) | 42(2) | 37(2) | -8(1)  | -1(1)  | -1(1)  |
| C(13) | 28(2) | 49(2) | 31(2) | -11(1) | 0(1)   | 9(1)   |
| C(14) | 42(2) | 39(2) | 42(2) | -15(2) | 11(2)  | -1(1)  |
| C(15) | 46(2) | 42(2) | 35(2) | -14(2) | -3(2)  | 7(2)   |
| C(16) | 41(2) | 44(2) | 34(2) | -12(1) | -5(1)  | 3(2)   |
| C(17) | 36(2) | 34(2) | 40(2) | -11(1) | -2(1)  | -3(1)  |
| C(18) | 35(2) | 35(2) | 40(2) | -10(1) | -1(1)  | -10(1) |
| C(19) | 33(2) | 35(2) | 46(2) | -13(1) | -2(1)  | -4(1)  |
| C(20) | 38(2) | 47(2) | 42(2) | -6(2)  | -10(2) | -8(2)  |
| C(21) | 44(2) | 43(2) | 42(2) | -10(2) | -14(2) | 3(2)   |
| C(22) | 36(2) | 49(2) | 43(2) | -11(2) | -21(2) | 8(2)   |
| C(23) | 40(2) | 43(2) | 39(2) | -13(2) | -6(1)  | 2(1)   |
| C(24) | 33(2) | 44(2) | 39(2) | -16(2) | -7(1)  | -3(1)  |
| C(25) | 31(2) | 41(2) | 45(2) | -9(2)  | -1(1)  | -9(1)  |
| C(26) | 33(2) | 38(2) | 44(2) | -12(2) | 0(1)   | -3(1)  |
| C(27) | 40(2) | 46(2) | 34(2) | -14(2) | 5(1)   | -11(2) |
| C(28) | 33(2) | 48(2) | 46(2) | -14(2) | 5(1)   | -12(2) |
| C(29) | 30(2) | 40(2) | 38(2) | -12(1) | 8(1)   | -16(1) |
| C(30) | 33(2) | 38(2) | 35(2) | -15(1) | 2(1)   | -10(1) |
| C(31) | 41(2) | 33(2) | 39(2) | -9(1)  | -4(1)  | -7(1)  |
| C(32) | 32(2) | 33(2) | 42(2) | -11(1) | -1(1)  | -5(1)  |
| C(33) | 42(2) | 46(2) | 42(2) | -11(2) | 2(2)   | -3(2)  |
| C(34) | 39(2) | 42(2) | 40(2) | -14(2) | 6(2)   | -9(1)  |
| C(35) | 51(2) | 46(2) | 39(2) | -11(2) | 15(2)  | -9(2)  |
| C(36) | 36(2) | 45(2) | 48(2) | -16(2) | -4(2)  | 0(1)   |
| C(37) | 36(2) | 39(2) | 45(2) | -15(2) | -10(2) | -2(1)  |
| C(38) | 46(2) | 44(2) | 39(2) | -14(2) | -14(2) | 12(2)  |
| F(1)  | 51(1) | 48(1) | 50(1) | 1(1)   | -1(1)  | 19(1)  |
| F(2)  | 47(1) | 48(1) | 46(1) | -18(1) | -17(1) | 8(1)   |
| F(3)  | 45(1) | 54(1) | 45(1) | -13(1) | -17(1) | 16(1)  |
| N(1)  | 33(1) | 38(1) | 40(2) | -10(1) | -3(1)  | -9(1)  |
| N(2)  | 29(1) | 42(2) | 33(1) | -6(1)  | 0(1)   | -4(1)  |
| N(3)  | 35(1) | 44(2) | 40(2) | -13(1) | 0(1)   | -12(1) |
| Ni(1) | 34(1) | 38(1) | 37(1) | -8(1)  | -2(1)  | -8(1)  |
| O(1)  | 39(1) | 42(1) | 46(1) | -2(1)  | 4(1)   | -14(1) |
| O(2)  | 33(1) | 49(1) | 32(1) | -13(1) | 3(1)   | -11(1) |

|       |       |       |       |        |        |        |
|-------|-------|-------|-------|--------|--------|--------|
| O(3)  | 34(1) | 46(1) | 40(1) | -13(1) | -3(1)  | -13(1) |
| O(4)  | 48(2) | 47(1) | 47(1) | -3(1)  | 21(1)  | -5(1)  |
| O(1W) | 33(3) | 34(3) | 53(4) | 5(3)   | 11(3)  | 6(2)   |
| O(2W) | 45(3) | 40(3) | 47(4) | -8(3)  | 18(3)  | -11(3) |
| O(3W) | 41(2) | 45(2) | 54(3) | -14(2) | -15(2) | -1(2)  |
| O(4W) | 58(4) | 48(4) | 51(4) | -14(3) | -16(3) | 10(3)  |
| O(5W) | 44(3) | 45(3) | 57(4) | -8(3)  | 7(3)   | -13(3) |

Table 5. Hydrogen coordinates ( $\times 10^4$ ) and isotropic displacement parameters ( $\text{Å}^2 \times 10^3$ ) for Ni-o-CF3-p-H.

|        | x     | y    | z     | U(eq) |
|--------|-------|------|-------|-------|
| H(1A)  | -2551 | 4050 | 1201  | 42    |
| H(1B)  | -1563 | 4780 | 1153  | 42    |
| H(3)   | -1636 | 5716 | 2537  | 46    |
| H(4)   | -2805 | 6615 | 3706  | 55    |
| H(5)   | -4713 | 6275 | 4233  | 52    |
| H(6)   | -5460 | 5069 | 3573  | 54    |
| H(7)   | -4284 | 4188 | 2385  | 48    |
| H(8A)  | -1664 | 1459 | 2721  | 44    |
| H(8B)  | -2795 | 2378 | 2584  | 44    |
| H(10A) | -1077 | 2746 | 675   | 44    |
| H(10B) | -368  | 1793 | 1420  | 44    |
| H(13)  | -2796 | 3382 | 5320  | 46    |
| H(14)  | -2578 | 4035 | 6659  | 52    |
| H(15)  | -734  | 4020 | 6995  | 51    |
| H(16)  | 854   | 3549 | 5912  | 49    |
| H(20)  | 1526  | 1269 | 5853  | 51    |
| H(21)  | 3283  | 314  | 6352  | 52    |
| H(22)  | 5014  | 1034 | 5512  | 51    |
| H(23)  | 5002  | 2504 | 4107  | 49    |
| H(24)  | 3231  | 3434 | 3562  | 45    |
| H(26)  | 677   | 5900 | 1245  | 47    |
| H(27)  | 2156  | 7038 | 978   | 48    |
| H(28)  | 4074  | 6153 | 785   | 51    |
| H(29)  | 4515  | 4185 | 726   | 43    |
| H(33)  | 3120  | 2834 | -664  | 54    |
| H(34)  | 4445  | 2190 | -1921 | 49    |
| H(35)  | 6240  | 1079 | -1582 | 58    |
| H(36)  | 6695  | 695  | -49   | 52    |
| H(1WD) | 9280  | 729  | 7260  | 56    |

|        |       |      |      |    |
|--------|-------|------|------|----|
| H(1WB) | 10071 | 1174 | 7607 | 71 |
| H(2WA) | 1278  | 9668 | 873  | 72 |
| H(2WB) | 1103  | 8722 | 551  | 72 |
| H(3WA) | 10490 | -492 | 4739 | 69 |
| H(3WB) | 10332 | 285  | 5339 | 69 |
| H(4WA) | 3813  | 9177 | 3221 | 80 |
| H(4WB) | 2836  | 9979 | 3413 | 80 |
| H(5WA) | 2123  | 1483 | 8946 | 76 |
| H(5WB) | 1052  | 1561 | 8667 | 76 |

---

Table 6. Torsion angles [deg] for Ni-o-CF3-p-H.

---

|                         |           |
|-------------------------|-----------|
| N(1)-C(1)-C(2)-C(7)     | -97.9(4)  |
| N(1)-C(1)-C(2)-C(3)     | 83.6(4)   |
| C(7)-C(2)-C(3)-C(4)     | 1.8(5)    |
| C(1)-C(2)-C(3)-C(4)     | -179.7(3) |
| C(2)-C(3)-C(4)-C(5)     | -0.3(5)   |
| C(3)-C(4)-C(5)-C(6)     | -0.8(5)   |
| C(4)-C(5)-C(6)-C(7)     | 0.4(5)    |
| C(3)-C(2)-C(7)-C(6)     | -2.2(5)   |
| C(1)-C(2)-C(7)-C(6)     | 179.3(3)  |
| C(5)-C(6)-C(7)-C(2)     | 1.2(5)    |
| N(1)-C(8)-C(9)-O(1)     | 160.8(3)  |
| N(1)-C(8)-C(9)-N(2)     | -25.3(4)  |
| N(1)-C(10)-C(11)-O(2)   | -157.2(3) |
| N(1)-C(10)-C(11)-N(3)   | 25.9(4)   |
| N(2)-C(12)-C(13)-C(14)  | -175.2(3) |
| C(17)-C(12)-C(13)-C(14) | 5.1(5)    |
| C(12)-C(13)-C(14)-C(15) | -5.1(5)   |
| C(13)-C(14)-C(15)-C(16) | 2.9(5)    |
| C(14)-C(15)-C(16)-C(17) | -0.9(5)   |
| C(15)-C(16)-C(17)-C(12) | 1.0(5)    |
| C(15)-C(16)-C(17)-C(18) | 178.0(3)  |
| C(13)-C(12)-C(17)-C(16) | -3.1(5)   |
| N(2)-C(12)-C(17)-C(16)  | 177.2(3)  |
| C(13)-C(12)-C(17)-C(18) | 179.9(3)  |
| N(2)-C(12)-C(17)-C(18)  | 0.3(5)    |
| C(16)-C(17)-C(18)-O(3)  | -152.1(3) |
| C(12)-C(17)-C(18)-O(3)  | 24.9(5)   |
| C(16)-C(17)-C(18)-C(19) | 30.7(4)   |
| C(12)-C(17)-C(18)-C(19) | -152.3(3) |
| O(3)-C(18)-C(19)-C(20)  | -132.2(3) |

|                         |           |
|-------------------------|-----------|
| C(17)-C(18)-C(19)-C(20) | 45.1(4)   |
| O(3)-C(18)-C(19)-C(24)  | 42.3(4)   |
| C(17)-C(18)-C(19)-C(24) | -140.4(3) |
| C(24)-C(19)-C(20)-C(21) | -1.3(5)   |
| C(18)-C(19)-C(20)-C(21) | 173.2(3)  |
| C(19)-C(20)-C(21)-C(22) | 3.1(5)    |
| C(20)-C(21)-C(22)-C(23) | -3.8(5)   |
| C(21)-C(22)-C(23)-C(24) | 2.6(5)    |
| C(20)-C(19)-C(24)-C(23) | 0.0(5)    |
| C(18)-C(19)-C(24)-C(23) | -174.6(3) |
| C(22)-C(23)-C(24)-C(19) | -0.7(5)   |
| N(3)-C(25)-C(26)-C(27)  | 175.5(3)  |
| C(30)-C(25)-C(26)-C(27) | -1.2(5)   |
| C(25)-C(26)-C(27)-C(28) | 0.5(5)    |
| C(26)-C(27)-C(28)-C(29) | 2.5(5)    |
| C(27)-C(28)-C(29)-C(30) | -4.7(5)   |
| C(28)-C(29)-C(30)-C(25) | 3.9(5)    |
| C(28)-C(29)-C(30)-C(31) | -170.8(3) |
| C(26)-C(25)-C(30)-C(29) | -1.0(5)   |
| N(3)-C(25)-C(30)-C(29)  | -177.6(3) |
| C(26)-C(25)-C(30)-C(31) | 173.5(3)  |
| N(3)-C(25)-C(30)-C(31)  | -3.1(5)   |
| C(29)-C(30)-C(31)-O(4)  | 130.1(4)  |
| C(25)-C(30)-C(31)-O(4)  | -44.4(5)  |
| C(29)-C(30)-C(31)-C(32) | -50.3(4)  |
| C(25)-C(30)-C(31)-C(32) | 135.1(3)  |
| O(4)-C(31)-C(32)-C(37)  | -62.0(5)  |
| C(30)-C(31)-C(32)-C(37) | 118.4(4)  |
| O(4)-C(31)-C(32)-C(33)  | 115.6(4)  |
| C(30)-C(31)-C(32)-C(33) | -64.0(4)  |
| C(37)-C(32)-C(33)-C(34) | 0.1(5)    |
| C(31)-C(32)-C(33)-C(34) | -177.5(3) |
| C(32)-C(33)-C(34)-C(35) | 0.1(5)    |
| C(33)-C(34)-C(35)-C(36) | -0.9(5)   |
| C(34)-C(35)-C(36)-C(37) | 1.6(6)    |
| C(35)-C(36)-C(37)-C(32) | -1.3(6)   |
| C(35)-C(36)-C(37)-C(38) | -177.7(3) |
| C(33)-C(32)-C(37)-C(36) | 0.4(5)    |
| C(31)-C(32)-C(37)-C(36) | 177.9(3)  |
| C(33)-C(32)-C(37)-C(38) | 176.7(3)  |
| C(31)-C(32)-C(37)-C(38) | -5.8(5)   |
| C(36)-C(37)-C(38)-F(3)  | 15.8(5)   |
| C(32)-C(37)-C(38)-F(3)  | -160.5(3) |
| C(36)-C(37)-C(38)-F(2)  | 137.9(3)  |



|                        |            |
|------------------------|------------|
| C(32)-C(37)-C(38)-F(2) | -38.4(5)   |
| C(36)-C(37)-C(38)-F(1) | -105.9(4)  |
| C(32)-C(37)-C(38)-F(1) | 77.8(4)    |
| C(9)-C(8)-N(1)-C(10)   | 145.0(3)   |
| C(9)-C(8)-N(1)-C(1)    | -92.3(3)   |
| C(9)-C(8)-N(1)-Ni(1)   | 33.9(3)    |
| C(11)-C(10)-N(1)-C(8)  | -153.4(3)  |
| C(11)-C(10)-N(1)-C(1)  | 82.1(3)    |
| C(11)-C(10)-N(1)-Ni(1) | -41.0(3)   |
| C(2)-C(1)-N(1)-C(8)    | 54.9(3)    |
| C(2)-C(1)-N(1)-C(10)   | -179.6(3)  |
| C(2)-C(1)-N(1)-Ni(1)   | -65.0(3)   |
| O(1)-C(9)-N(2)-C(12)   | -9.4(5)    |
| C(8)-C(9)-N(2)-C(12)   | 177.4(3)   |
| O(1)-C(9)-N(2)-Ni(1)   | 176.0(3)   |
| C(8)-C(9)-N(2)-Ni(1)   | 2.8(4)     |
| C(13)-C(12)-N(2)-C(9)  | -26.5(5)   |
| C(17)-C(12)-N(2)-C(9)  | 153.2(3)   |
| C(13)-C(12)-N(2)-Ni(1) | 147.6(3)   |
| C(17)-C(12)-N(2)-Ni(1) | -32.7(4)   |
| O(2)-C(11)-N(3)-C(25)  | 5.7(5)     |
| C(10)-C(11)-N(3)-C(25) | -177.7(3)  |
| O(2)-C(11)-N(3)-Ni(1)  | -173.0(3)  |
| C(10)-C(11)-N(3)-Ni(1) | 3.6(3)     |
| C(26)-C(25)-N(3)-C(11) | 110.1(4)   |
| C(30)-C(25)-N(3)-C(11) | -73.3(5)   |
| C(26)-C(25)-N(3)-Ni(1) | -71.4(4)   |
| C(30)-C(25)-N(3)-Ni(1) | 105.2(4)   |
| C(9)-N(2)-Ni(1)-O(3)   | -151.6(2)  |
| C(12)-N(2)-Ni(1)-O(3)  | 34.0(3)    |
| C(9)-N(2)-Ni(1)-N(3)   | 19.1(12)   |
| C(12)-N(2)-Ni(1)-N(3)  | -155.4(10) |
| C(9)-N(2)-Ni(1)-N(1)   | 14.5(2)    |
| C(12)-N(2)-Ni(1)-N(1)  | -160.0(3)  |
| C(11)-N(3)-Ni(1)-O(3)  | 142.6(2)   |
| C(25)-N(3)-Ni(1)-O(3)  | -36.0(3)   |
| C(11)-N(3)-Ni(1)-N(2)  | -28.0(12)  |
| C(25)-N(3)-Ni(1)-N(2)  | 153.3(10)  |
| C(11)-N(3)-Ni(1)-N(1)  | -23.4(2)   |
| C(25)-N(3)-Ni(1)-N(1)  | 158.0(3)   |
| C(8)-N(1)-Ni(1)-O(3)   | 67.8(5)    |
| C(10)-N(1)-Ni(1)-O(3)  | -50.8(5)   |
| C(1)-N(1)-Ni(1)-O(3)   | -168.6(4)  |
| C(8)-N(1)-Ni(1)-N(2)   | -27.2(2)   |

|                        |           |
|------------------------|-----------|
| C(10)-N(1)-Ni(1)-N(2)  | -145.8(2) |
| C(1)-N(1)-Ni(1)-N(2)   | 96.4(2)   |
| C(8)-N(1)-Ni(1)-N(3)   | 153.3(2)  |
| C(10)-N(1)-Ni(1)-N(3)  | 34.8(2)   |
| C(1)-N(1)-Ni(1)-N(3)   | -83.1(2)  |
| C(17)-C(18)-O(3)-Ni(1) | -15.9(4)  |
| C(19)-C(18)-O(3)-Ni(1) | 161.4(2)  |
| N(2)-Ni(1)-O(3)-C(18)  | -10.0(3)  |
| N(3)-Ni(1)-O(3)-C(18)  | 171.1(3)  |
| N(1)-Ni(1)-O(3)-C(18)  | -104.4(5) |

---

Symmetry transformations used to generate equivalent atoms:

Table 7. Hydrogen bonds for Ni-o-CF<sub>3</sub>-p-H [A and deg.].

---

| D-H...A | d(D-H) | d(H...A) | d(D...A) | <(DHA) |
|---------|--------|----------|----------|--------|
|---------|--------|----------|----------|--------|

ORTEP drawing of compound 13. (CCDC number 951882)

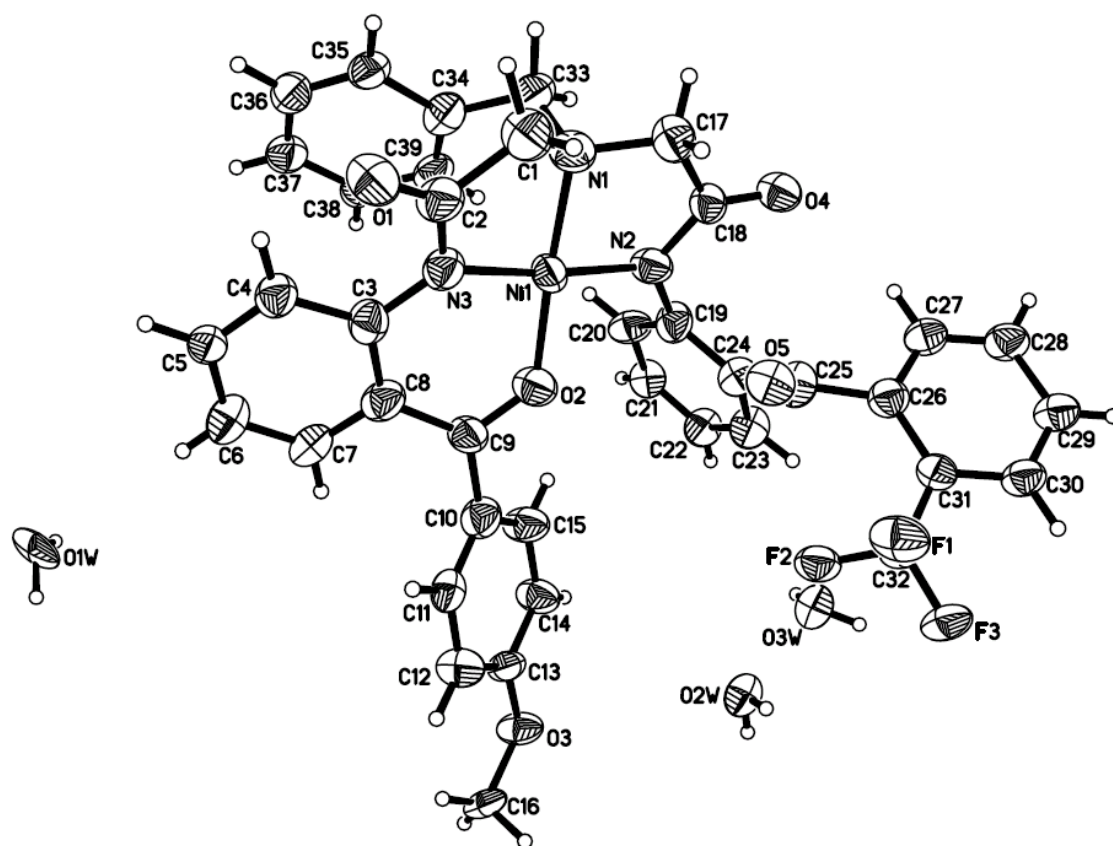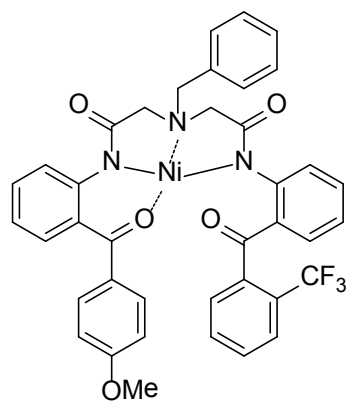

Ni-o-CF<sub>3</sub>-p-OMe

Table 1. Crystal data and structure refinement for complex **13**.

|                                   |                                                                                                                                              |
|-----------------------------------|----------------------------------------------------------------------------------------------------------------------------------------------|
| Identification code               | a                                                                                                                                            |
| Empirical formula                 | C <sub>39</sub> H <sub>30</sub> F <sub>3</sub> N <sub>3</sub> Ni O <sub>5</sub>                                                              |
| Formula weight                    | 736.36                                                                                                                                       |
| Temperature                       | 291(2) K                                                                                                                                     |
| Wavelength                        | 0.71073 Å                                                                                                                                    |
| Crystal system, space group       | Triclinic, P-1                                                                                                                               |
| Unit cell dimensions              | a = 9.648(4) Å    alpha = 66.870(7) deg.<br>b = 13.897(6) Å    beta = 74.393(7) deg.<br>c = 16.270(7) Å    gamma = 87.648(8) deg.            |
| Volume                            | 1927.0(14) Å <sup>3</sup>                                                                                                                    |
| Z, Calculated density             | 2, 1.300 Mg/m <sup>3</sup>                                                                                                                   |
| Absorption coefficient            | 0.565 mm <sup>-1</sup>                                                                                                                       |
| F(000)                            | 780                                                                                                                                          |
| Crystal size                      | 0.28 x 0.24 x 0.22 mm                                                                                                                        |
| Theta range for data collection   | 2.20 to 26.00 deg.                                                                                                                           |
| Limiting indices                  | -11 ≤ h ≤ 11, -9 ≤ k ≤ 17, -16 ≤ l ≤ 20                                                                                                      |
| Reflections collected / unique    | 10590 / 7415 [R(int) = 0.0293]                                                                                                               |
| Completeness to theta = 26.00     | 98.1 %                                                                                                                                       |
| Absorption correction             | Semi-empirical from equivalents                                                                                                              |
| Max. and min. transmission        | 0.8 and 0.7                                                                                                                                  |
| Refinement method                 | Full-matrix least-squares on F <sup>2</sup>                                                                                                  |
| Data / restraints / parameters    | 7415 / 1* / 488                                                                                                                              |
|                                   | *Rigid bond restraint (DELU in Shelxl) was applied to anisotropic displacement parameters of N(2) and C(18) to treat asp's small elongation. |
| Goodness-of-fit on F <sup>2</sup> | 0.980                                                                                                                                        |
| Final R indices [I > 2sigma(I)]   | R1 = 0.0552, wR2 = 0.0954                                                                                                                    |
| R indices (all data)              | R1 = 0.0853, wR2 = 0.1010                                                                                                                    |
| Largest diff. peak and hole       | 0.559 and -0.421 e.Å <sup>-3</sup>                                                                                                           |

Table 2. Atomic coordinates (x 10<sup>4</sup>) and equivalent isotropic displacement parameters (Å<sup>2</sup> x 10<sup>3</sup>) for No.1.

U(eq) is defined as one third of the trace of the orthogonalized U<sub>ij</sub> tensor.

|      | x      | y       | z       | U(eq) |
|------|--------|---------|---------|-------|
| C(1) | 491(4) | -529(3) | 7456(2) | 54(1) |
| C(2) | 138(3) | 239(2)  | 7921(2) | 44(1) |
| C(3) | 946(3) | 1880(2) | 7833(2) | 42(1) |
| C(4) | 593(3) | 1637(2) | 8786(2) | 43(1) |
| C(5) | 745(3) | 2353(2) | 9140(2) | 40(1) |

|       |         |         |         |       |
|-------|---------|---------|---------|-------|
| C(6)  | 1203(3) | 3358(2) | 8564(2) | 47(1) |
| C(7)  | 1576(3) | 3661(2) | 7638(2) | 44(1) |
| C(8)  | 1430(3) | 2932(2) | 7240(2) | 47(1) |
| C(9)  | 1830(3) | 3330(2) | 6227(2) | 42(1) |
| C(10) | 1998(3) | 4441(2) | 5613(2) | 47(1) |
| C(11) | 1015(3) | 5134(2) | 5742(2) | 38(1) |
| C(12) | 1110(3) | 6185(2) | 5175(2) | 48(1) |
| C(13) | 2308(3) | 6566(2) | 4424(2) | 40(1) |
| C(14) | 3383(3) | 5906(2) | 4246(2) | 51(1) |
| C(15) | 3186(4) | 4840(2) | 4853(2) | 55(1) |
| C(16) | 1688(3) | 8346(2) | 3960(2) | 44(1) |
| C(17) | 1935(3) | -519(2) | 5940(2) | 46(1) |
| C(18) | 2899(3) | 308(2)  | 5069(2) | 39(1) |
| C(19) | 4001(3) | 2046(2) | 4423(2) | 44(1) |
| C(20) | 5243(3) | 2447(2) | 4507(2) | 46(1) |
| C(21) | 6081(3) | 3336(2) | 3785(2) | 43(1) |
| C(22) | 5646(3) | 3835(2) | 3011(2) | 45(1) |
| C(23) | 4480(3) | 3446(2) | 2900(2) | 47(1) |
| C(24) | 3589(3) | 2566(2) | 3604(2) | 41(1) |
| C(25) | 2261(3) | 2262(2) | 3438(2) | 46(1) |
| C(26) | 2394(3) | 2312(2) | 2485(2) | 43(1) |
| C(27) | 3331(3) | 1676(2) | 2188(2) | 42(1) |
| C(28) | 3513(3) | 1643(2) | 1342(2) | 47(1) |
| C(29) | 2756(3) | 2298(2) | 737(2)  | 47(1) |
| C(30) | 1845(3) | 2959(2) | 1001(2) | 44(1) |
| C(31) | 1647(3) | 2976(2) | 1884(2) | 40(1) |
| C(32) | 603(3)  | 3687(2) | 2132(2) | 47(1) |
| C(33) | 3119(3) | -704(2) | 7160(2) | 48(1) |
| C(34) | 3446(3) | -282(2) | 7809(2) | 47(1) |
| C(35) | 2753(3) | -760(2) | 8779(2) | 45(1) |
| C(36) | 3022(3) | -345(2) | 9343(2) | 45(1) |
| C(37) | 3990(3) | 532(2)  | 9016(2) | 48(1) |
| C(38) | 4650(3) | 958(2)  | 8079(2) | 45(1) |
| C(39) | 4382(3) | 574(2)  | 7484(2) | 44(1) |
| F(1)  | -639(2) | 3193(1) | 2712(1) | 56(1) |
| F(2)  | 1067(2) | 4166(1) | 2591(1) | 48(1) |
| F(3)  | 292(2)  | 4438(1) | 1432(1) | 49(1) |
| N(1)  | 1899(3) | -231(2) | 6746(2) | 46(1) |
| N(2)  | 3158(3) | 1202(2) | 5173(2) | 43(1) |
| N(3)  | 908(3)  | 1142(2) | 7448(2) | 42(1) |
| Ni(1) | 2086(1) | 1258(1) | 6294(1) | 38(1) |
| O(1)  | -811(2) | -29(2)  | 8666(1) | 49(1) |
| O(2)  | 2194(2) | 2701(2) | 5798(1) | 47(1) |
| O(3)  | 2642(2) | 7595(2) | 3806(1) | 47(1) |

|       |         |         |         |       |
|-------|---------|---------|---------|-------|
| O(4)  | 3404(2) | 129(2)  | 4363(1) | 45(1) |
| O(5)  | 1111(2) | 2018(2) | 4038(1) | 45(1) |
| O(1W) | 3035(7) | 6043(5) | 9572(5) | 64(2) |
| O(2W) | 2983(6) | 6808(4) | 1708(3) | 49(1) |
| O(3W) | 4314(7) | 5858(5) | 1102(4) | 48(2) |

---

Table 3. Bond lengths [Å] and angles [deg] for No.1.

---

|              |          |
|--------------|----------|
| C(1)-N(1)    | 1.475(4) |
| C(1)-C(2)    | 1.515(4) |
| C(1)-H(1A)   | 0.9700   |
| C(1)-H(1B)   | 0.9700   |
| C(2)-O(1)    | 1.233(3) |
| C(2)-N(3)    | 1.315(4) |
| C(3)-N(3)    | 1.402(4) |
| C(3)-C(4)    | 1.394(4) |
| C(3)-C(8)    | 1.411(4) |
| C(4)-C(5)    | 1.361(4) |
| C(4)-H(4)    | 0.9300   |
| C(5)-C(6)    | 1.350(4) |
| C(5)-H(5)    | 0.9300   |
| C(6)-C(7)    | 1.342(4) |
| C(6)-H(6)    | 0.9300   |
| C(7)-C(8)    | 1.428(4) |
| C(7)-H(7)    | 0.9300   |
| C(8)-C(9)    | 1.460(4) |
| C(9)-O(2)    | 1.302(3) |
| C(9)-C(10)   | 1.460(4) |
| C(10)-C(11)  | 1.359(4) |
| C(10)-C(15)  | 1.378(4) |
| C(11)-C(12)  | 1.379(4) |
| C(11)-H(11)  | 0.9300   |
| C(12)-C(13)  | 1.376(4) |
| C(12)-H(12)  | 0.9300   |
| C(13)-O(3)   | 1.376(3) |
| C(13)-C(14)  | 1.403(4) |
| C(14)-C(15)  | 1.406(4) |
| C(14)-H(14)  | 0.9300   |
| C(15)-H(15)  | 0.9300   |
| C(16)-O(3)   | 1.415(3) |
| C(16)-H(16A) | 0.9600   |
| C(16)-H(16B) | 0.9600   |

|              |          |
|--------------|----------|
| C(16)-H(16C) | 0.9600   |
| C(17)-N(1)   | 1.507(4) |
| C(17)-C(18)  | 1.513(4) |
| C(17)-H(17A) | 0.9700   |
| C(17)-H(17B) | 0.9700   |
| C(18)-O(4)   | 1.238(3) |
| C(18)-N(2)   | 1.359(4) |
| C(19)-N(2)   | 1.395(4) |
| C(19)-C(20)  | 1.402(4) |
| C(19)-C(24)  | 1.401(4) |
| C(20)-C(21)  | 1.411(4) |
| C(20)-H(20)  | 0.9300   |
| C(21)-C(22)  | 1.348(4) |
| C(21)-H(21)  | 0.9300   |
| C(22)-C(23)  | 1.352(4) |
| C(22)-H(22)  | 0.9300   |
| C(23)-C(24)  | 1.415(4) |
| C(23)-H(23)  | 0.9300   |
| C(24)-C(25)  | 1.486(4) |
| C(25)-O(5)   | 1.219(3) |
| C(25)-C(26)  | 1.495(4) |
| C(26)-C(27)  | 1.366(4) |
| C(26)-C(31)  | 1.394(4) |
| C(27)-C(28)  | 1.358(4) |
| C(27)-H(27)  | 0.9300   |
| C(28)-C(29)  | 1.400(4) |
| C(28)-H(28)  | 0.9300   |
| C(29)-C(30)  | 1.357(4) |
| C(29)-H(29)  | 0.9300   |
| C(30)-C(31)  | 1.407(4) |
| C(30)-H(30)  | 0.9300   |
| C(31)-C(32)  | 1.471(4) |
| C(32)-F(3)   | 1.305(3) |
| C(32)-F(1)   | 1.322(3) |
| C(32)-F(2)   | 1.341(4) |
| C(33)-C(34)  | 1.496(4) |
| C(33)-N(1)   | 1.512(4) |
| C(33)-H(33A) | 0.9700   |
| C(33)-H(33B) | 0.9700   |
| C(34)-C(39)  | 1.359(4) |
| C(34)-C(35)  | 1.422(4) |
| C(35)-C(36)  | 1.342(4) |
| C(35)-H(35)  | 0.9300   |
| C(36)-C(37)  | 1.399(4) |

|                  |          |
|------------------|----------|
| C(36)-H(36)      | 0.9300   |
| C(37)-C(38)      | 1.371(4) |
| C(37)-H(37)      | 0.9300   |
| C(38)-C(39)      | 1.356(4) |
| C(38)-H(38)      | 0.9300   |
| C(39)-H(39)      | 0.9300   |
| N(1)-Ni(1)       | 1.902(3) |
| N(2)-Ni(1)       | 1.868(2) |
| N(3)-Ni(1)       | 1.864(2) |
| Ni(1)-O(2)       | 1.839(2) |
| O(1W)-H(1WA)     | 0.8500   |
| O(1W)-H(1WB)     | 0.8500   |
| O(2W)-H(2WA)     | 0.8499   |
| O(2W)-H(2WC)     | 0.8500   |
| O(3W)-H(3WA)     | 0.8500   |
| O(3W)-H(3WB)     | 0.8500   |
| N(1)-C(1)-C(2)   | 111.5(3) |
| N(1)-C(1)-H(1A)  | 109.3    |
| C(2)-C(1)-H(1A)  | 109.3    |
| N(1)-C(1)-H(1B)  | 109.3    |
| C(2)-C(1)-H(1B)  | 109.3    |
| H(1A)-C(1)-H(1B) | 108.0    |
| O(1)-C(2)-N(3)   | 128.0(3) |
| O(1)-C(2)-C(1)   | 118.6(3) |
| N(3)-C(2)-C(1)   | 113.4(3) |
| N(3)-C(3)-C(4)   | 124.1(3) |
| N(3)-C(3)-C(8)   | 119.5(3) |
| C(4)-C(3)-C(8)   | 116.4(3) |
| C(5)-C(4)-C(3)   | 122.8(3) |
| C(5)-C(4)-H(4)   | 118.6    |
| C(3)-C(4)-H(4)   | 118.6    |
| C(4)-C(5)-C(6)   | 120.1(3) |
| C(4)-C(5)-H(5)   | 119.9    |
| C(6)-C(5)-H(5)   | 119.9    |
| C(7)-C(6)-C(5)   | 121.1(3) |
| C(7)-C(6)-H(6)   | 119.5    |
| C(5)-C(6)-H(6)   | 119.5    |
| C(6)-C(7)-C(8)   | 120.4(3) |
| C(6)-C(7)-H(7)   | 119.8    |
| C(8)-C(7)-H(7)   | 119.8    |
| C(3)-C(8)-C(7)   | 119.1(3) |
| C(3)-C(8)-C(9)   | 123.9(3) |
| C(7)-C(8)-C(9)   | 117.0(3) |
| O(2)-C(9)-C(8)   | 121.1(3) |



|                     |          |
|---------------------|----------|
| O(2)-C(9)-C(10)     | 114.4(3) |
| C(8)-C(9)-C(10)     | 124.2(3) |
| C(11)-C(10)-C(15)   | 116.3(3) |
| C(11)-C(10)-C(9)    | 123.1(3) |
| C(15)-C(10)-C(9)    | 120.6(3) |
| C(10)-C(11)-C(12)   | 125.3(3) |
| C(10)-C(11)-H(11)   | 117.3    |
| C(12)-C(11)-H(11)   | 117.3    |
| C(13)-C(12)-C(11)   | 117.2(3) |
| C(13)-C(12)-H(12)   | 121.4    |
| C(11)-C(12)-H(12)   | 121.4    |
| C(12)-C(13)-O(3)    | 126.2(2) |
| C(12)-C(13)-C(14)   | 121.0(3) |
| O(3)-C(13)-C(14)    | 112.7(2) |
| C(13)-C(14)-C(15)   | 117.9(3) |
| C(13)-C(14)-H(14)   | 121.1    |
| C(15)-C(14)-H(14)   | 121.1    |
| C(10)-C(15)-C(14)   | 122.2(3) |
| C(10)-C(15)-H(15)   | 118.9    |
| C(14)-C(15)-H(15)   | 118.9    |
| O(3)-C(16)-H(16A)   | 109.5    |
| O(3)-C(16)-H(16B)   | 109.5    |
| H(16A)-C(16)-H(16B) | 109.5    |
| O(3)-C(16)-H(16C)   | 109.5    |
| H(16A)-C(16)-H(16C) | 109.5    |
| H(16B)-C(16)-H(16C) | 109.5    |
| N(1)-C(17)-C(18)    | 108.0(2) |
| N(1)-C(17)-H(17A)   | 110.1    |
| C(18)-C(17)-H(17A)  | 110.1    |
| N(1)-C(17)-H(17B)   | 110.1    |
| C(18)-C(17)-H(17B)  | 110.1    |
| H(17A)-C(17)-H(17B) | 108.4    |
| O(4)-C(18)-N(2)     | 126.1(3) |
| O(4)-C(18)-C(17)    | 120.6(3) |
| N(2)-C(18)-C(17)    | 113.3(2) |
| N(2)-C(19)-C(20)    | 119.7(3) |
| N(2)-C(19)-C(24)    | 121.9(3) |
| C(20)-C(19)-C(24)   | 118.2(3) |
| C(19)-C(20)-C(21)   | 121.6(3) |
| C(19)-C(20)-H(20)   | 119.2    |
| C(21)-C(20)-H(20)   | 119.2    |
| C(22)-C(21)-C(20)   | 119.2(3) |
| C(22)-C(21)-H(21)   | 120.4    |
| C(20)-C(21)-H(21)   | 120.4    |

|                     |          |
|---------------------|----------|
| C(21)-C(22)-C(23)   | 120.4(3) |
| C(21)-C(22)-H(22)   | 119.8    |
| C(23)-C(22)-H(22)   | 119.8    |
| C(22)-C(23)-C(24)   | 122.8(3) |
| C(22)-C(23)-H(23)   | 118.6    |
| C(24)-C(23)-H(23)   | 118.6    |
| C(19)-C(24)-C(23)   | 117.7(3) |
| C(19)-C(24)-C(25)   | 124.0(3) |
| C(23)-C(24)-C(25)   | 118.3(3) |
| O(5)-C(25)-C(24)    | 121.9(3) |
| O(5)-C(25)-C(26)    | 121.6(3) |
| C(24)-C(25)-C(26)   | 116.5(2) |
| C(27)-C(26)-C(31)   | 118.7(3) |
| C(27)-C(26)-C(25)   | 117.2(3) |
| C(31)-C(26)-C(25)   | 124.1(3) |
| C(28)-C(27)-C(26)   | 122.0(3) |
| C(28)-C(27)-H(27)   | 119.0    |
| C(26)-C(27)-H(27)   | 119.0    |
| C(27)-C(28)-C(29)   | 119.7(3) |
| C(27)-C(28)-H(28)   | 120.1    |
| C(29)-C(28)-H(28)   | 120.1    |
| C(30)-C(29)-C(28)   | 119.7(3) |
| C(30)-C(29)-H(29)   | 120.2    |
| C(28)-C(29)-H(29)   | 120.2    |
| C(29)-C(30)-C(31)   | 120.1(3) |
| C(29)-C(30)-H(30)   | 119.9    |
| C(31)-C(30)-H(30)   | 119.9    |
| C(26)-C(31)-C(30)   | 119.6(3) |
| C(26)-C(31)-C(32)   | 123.4(3) |
| C(30)-C(31)-C(32)   | 116.9(2) |
| F(3)-C(32)-F(1)     | 106.5(2) |
| F(3)-C(32)-F(2)     | 105.5(2) |
| F(1)-C(32)-F(2)     | 103.6(2) |
| F(3)-C(32)-C(31)    | 115.2(3) |
| F(1)-C(32)-C(31)    | 113.0(3) |
| F(2)-C(32)-C(31)    | 112.1(2) |
| C(34)-C(33)-N(1)    | 116.0(2) |
| C(34)-C(33)-H(33A)  | 108.3    |
| N(1)-C(33)-H(33A)   | 108.3    |
| C(34)-C(33)-H(33B)  | 108.3    |
| N(1)-C(33)-H(33B)   | 108.3    |
| H(33A)-C(33)-H(33B) | 107.4    |
| C(39)-C(34)-C(35)   | 118.8(3) |
| C(39)-C(34)-C(33)   | 120.9(3) |

|                     |            |
|---------------------|------------|
| C(35)-C(34)-C(33)   | 120.3(3)   |
| C(36)-C(35)-C(34)   | 119.2(3)   |
| C(36)-C(35)-H(35)   | 120.4      |
| C(34)-C(35)-H(35)   | 120.4      |
| C(35)-C(36)-C(37)   | 122.3(3)   |
| C(35)-C(36)-H(36)   | 118.8      |
| C(37)-C(36)-H(36)   | 118.8      |
| C(38)-C(37)-C(36)   | 116.4(3)   |
| C(38)-C(37)-H(37)   | 121.8      |
| C(36)-C(37)-H(37)   | 121.8      |
| C(39)-C(38)-C(37)   | 122.9(3)   |
| C(39)-C(38)-H(38)   | 118.6      |
| C(37)-C(38)-H(38)   | 118.6      |
| C(38)-C(39)-C(34)   | 120.3(3)   |
| C(38)-C(39)-H(39)   | 119.9      |
| C(34)-C(39)-H(39)   | 119.9      |
| C(1)-N(1)-C(17)     | 112.6(2)   |
| C(1)-N(1)-C(33)     | 111.6(2)   |
| C(17)-N(1)-C(33)    | 109.9(2)   |
| C(1)-N(1)-Ni(1)     | 104.20(18) |
| C(17)-N(1)-Ni(1)    | 107.81(18) |
| C(33)-N(1)-Ni(1)    | 110.60(19) |
| C(18)-N(2)-C(19)    | 119.9(2)   |
| C(18)-N(2)-Ni(1)    | 114.77(19) |
| C(19)-N(2)-Ni(1)    | 124.59(19) |
| C(2)-N(3)-C(3)      | 122.2(2)   |
| C(2)-N(3)-Ni(1)     | 113.3(2)   |
| C(3)-N(3)-Ni(1)     | 124.14(19) |
| O(2)-Ni(1)-N(3)     | 93.67(10)  |
| O(2)-Ni(1)-N(2)     | 93.03(9)   |
| N(3)-Ni(1)-N(2)     | 172.54(11) |
| O(2)-Ni(1)-N(1)     | 175.95(11) |
| N(3)-Ni(1)-N(1)     | 87.90(11)  |
| N(2)-Ni(1)-N(1)     | 85.21(10)  |
| C(9)-O(2)-Ni(1)     | 128.69(19) |
| C(13)-O(3)-C(16)    | 117.6(2)   |
| H(1WA)-O(1W)-H(1WB) | 109.5      |
| H(2WA)-O(2W)-H(2WC) | 109.5      |
| H(3WA)-O(3W)-H(3WB) | 109.5      |

---

Symmetry transformations used to generate equivalent atoms:

Table 4. Anisotropic displacement parameters ( $\text{Å}^2 \times 10^3$ ) for No.1.

The anisotropic displacement factor exponent takes the form:

$$-2 \pi^2 [ h^2 a^{*2} U11 + \dots + 2 h k a^* b^* U12 ]$$

|       | U11   | U22   | U33   | U23    | U13    | U12    |
|-------|-------|-------|-------|--------|--------|--------|
| C(1)  | 53(2) | 53(2) | 45(2) | -18(2) | 5(1)   | -6(2)  |
| C(2)  | 43(2) | 41(2) | 38(2) | -10(1) | -1(1)  | 1(1)   |
| C(3)  | 40(2) | 48(2) | 36(2) | -17(1) | -5(1)  | 2(1)   |
| C(4)  | 42(2) | 46(2) | 36(2) | -14(1) | -6(1)  | 5(1)   |
| C(5)  | 42(2) | 41(2) | 36(2) | -14(1) | -10(1) | 13(1)  |
| C(6)  | 43(2) | 56(2) | 40(2) | -13(2) | -15(1) | -11(1) |
| C(7)  | 42(2) | 46(2) | 36(2) | -5(1)  | -14(1) | -1(1)  |
| C(8)  | 46(2) | 45(2) | 36(2) | -7(1)  | -4(1)  | 4(1)   |
| C(9)  | 50(2) | 31(1) | 36(2) | -11(1) | -2(1)  | 0(1)   |
| C(10) | 53(2) | 43(2) | 38(2) | -11(1) | -10(1) | -2(1)  |
| C(11) | 43(2) | 40(2) | 31(1) | -12(1) | -8(1)  | -8(1)  |
| C(12) | 39(2) | 40(2) | 53(2) | -11(1) | -5(1)  | 2(1)   |
| C(13) | 42(2) | 37(2) | 33(1) | -7(1)  | -11(1) | 13(1)  |
| C(14) | 52(2) | 41(2) | 46(2) | -12(1) | 2(1)   | 11(1)  |
| C(15) | 58(2) | 42(2) | 42(2) | -5(2)  | 4(2)   | 13(2)  |
| C(16) | 42(2) | 39(2) | 39(2) | 0(1)   | -18(1) | 12(1)  |
| C(17) | 45(2) | 48(2) | 41(2) | -19(1) | -4(1)  | -5(1)  |
| C(18) | 40(2) | 41(1) | 40(2) | -19(1) | -16(1) | 3(1)   |
| C(19) | 47(2) | 46(2) | 33(1) | -13(1) | -5(1)  | -4(1)  |
| C(20) | 38(2) | 42(2) | 50(2) | -11(1) | -13(1) | 13(1)  |
| C(21) | 35(2) | 47(2) | 43(2) | -18(1) | -6(1)  | -3(1)  |
| C(22) | 45(2) | 39(2) | 48(2) | -11(1) | -14(1) | -14(1) |
| C(23) | 45(2) | 45(2) | 44(2) | -10(1) | -9(1)  | -16(1) |
| C(24) | 35(2) | 43(2) | 37(2) | -12(1) | -5(1)  | -1(1)  |
| C(25) | 41(2) | 50(2) | 39(2) | -14(1) | -5(1)  | -6(1)  |
| C(26) | 43(2) | 41(2) | 46(2) | -16(1) | -16(1) | 5(1)   |
| C(27) | 36(2) | 43(2) | 46(2) | -14(1) | -13(1) | 9(1)   |
| C(28) | 42(2) | 47(2) | 51(2) | -20(2) | -13(1) | 17(1)  |
| C(29) | 47(2) | 44(2) | 45(2) | -13(1) | -11(1) | 12(1)  |
| C(30) | 45(2) | 44(2) | 42(2) | -15(1) | -13(1) | 15(1)  |
| C(31) | 45(2) | 30(1) | 43(2) | -12(1) | -13(1) | 1(1)   |
| C(32) | 49(2) | 45(2) | 39(2) | -11(1) | -11(1) | 11(1)  |
| C(33) | 55(2) | 43(2) | 37(2) | -10(1) | -8(1)  | 11(1)  |
| C(34) | 43(2) | 52(2) | 40(2) | -13(1) | -10(1) | 7(1)   |
| C(35) | 53(2) | 36(2) | 35(2) | -8(1)  | -4(1)  | 4(1)   |

|       |       |       |       |        |        |        |
|-------|-------|-------|-------|--------|--------|--------|
| C(36) | 44(2) | 47(2) | 40(2) | -16(1) | -9(1)  | 11(1)  |
| C(37) | 50(2) | 45(2) | 46(2) | -16(2) | -15(1) | 13(1)  |
| C(38) | 49(2) | 46(2) | 38(2) | -15(1) | -11(1) | 14(1)  |
| C(39) | 43(2) | 46(2) | 37(2) | -10(1) | -14(1) | 18(1)  |
| F(1)  | 51(1) | 50(1) | 52(1) | -17(1) | 5(1)   | 13(1)  |
| F(2)  | 49(1) | 43(1) | 50(1) | -19(1) | -14(1) | 18(1)  |
| F(3)  | 43(1) | 49(1) | 49(1) | -12(1) | -16(1) | 20(1)  |
| N(1)  | 47(2) | 38(1) | 44(1) | -14(1) | -4(1)  | -4(1)  |
| N(2)  | 47(1) | 34(1) | 39(1) | -12(1) | -3(1)  | 6(1)   |
| N(3)  | 44(1) | 44(1) | 34(1) | -13(1) | -8(1)  | 6(1)   |
| Ni(1) | 45(1) | 35(1) | 34(1) | -17(1) | -6(1)  | 2(1)   |
| O(1)  | 43(1) | 41(1) | 50(1) | -19(1) | 12(1)  | -14(1) |
| O(2)  | 49(1) | 39(1) | 46(1) | -16(1) | -5(1)  | 5(1)   |
| O(3)  | 42(1) | 33(1) | 45(1) | 1(1)   | -3(1)  | 3(1)   |
| O(4)  | 46(1) | 38(1) | 42(1) | -14(1) | -1(1)  | 1(1)   |
| O(5)  | 35(1) | 43(1) | 50(1) | -15(1) | -4(1)  | -6(1)  |
| O(1W) | 42(4) | 39(4) | 77(5) | -21(4) | 35(4)  | 1(3)   |
| O(2W) | 51(3) | 53(3) | 41(3) | -13(3) | -15(2) | -4(2)  |
| O(3W) | 34(4) | 64(5) | 39(4) | -16(3) | -4(3)  | -5(3)  |

Table 5. Hydrogen coordinates ( $\times 10^4$ ) and isotropic displacement parameters ( $\text{Å}^2 \times 10^3$ ) for No.1.

|        | x    | y     | z    | U(eq) |
|--------|------|-------|------|-------|
| H(1A)  | 508  | -1225 | 7923 | 65    |
| H(1B)  | -257 | -552  | 7167 | 65    |
| H(4)   | 239  | 956   | 9196 | 52    |
| H(5)   | 534  | 2150  | 9780 | 48    |
| H(6)   | 1259 | 3849  | 8813 | 56    |
| H(7)   | 1933 | 4348  | 7253 | 53    |
| H(11)  | 212  | 4877  | 6255 | 46    |
| H(12)  | 394  | 6619  | 5296 | 58    |
| H(14)  | 4200 | 6165  | 3744 | 62    |
| H(15)  | 3880 | 4390  | 4738 | 66    |
| H(16A) | 1070 | 8053  | 4584 | 66    |
| H(16B) | 1112 | 8537  | 3529 | 66    |
| H(16C) | 2234 | 8958  | 3872 | 66    |
| H(17A) | 969  | -547  | 5874 | 55    |
| H(17B) | 2309 | -1203 | 6043 | 55    |
| H(20)  | 5520 | 2120  | 5052 | 55    |
| H(21)  | 6923 | 3575  | 3842 | 51    |

|        |      |       |      |    |
|--------|------|-------|------|----|
| H(22)  | 6152 | 4451  | 2550 | 54 |
| H(23)  | 4253 | 3771  | 2337 | 57 |
| H(27)  | 3859 | 1251  | 2577 | 51 |
| H(28)  | 4139 | 1188  | 1166 | 56 |
| H(29)  | 2876 | 2280  | 157  | 57 |
| H(30)  | 1350 | 3402  | 597  | 53 |
| H(33A) | 2890 | -1454 | 7492 | 58 |
| H(33B) | 3985 | -597  | 6655 | 58 |
| H(35)  | 2120 | -1353 | 9018 | 54 |
| H(36)  | 2548 | -652  | 9974 | 54 |
| H(37)  | 4175 | 811   | 9413 | 57 |
| H(38)  | 5311 | 1535  | 7841 | 54 |
| H(39)  | 4840 | 898   | 6852 | 53 |
| H(1WA) | 3931 | 6233  | 9349 | 96 |
| H(1WB) | 2551 | 6564  | 9362 | 96 |
| H(2WA) | 3202 | 7441  | 1324 | 74 |
| H(2WC) | 2147 | 6617  | 1724 | 74 |
| H(3WA) | 4199 | 5990  | 570  | 72 |
| H(3WB) | 5191 | 6005  | 1045 | 72 |

Table 6. Torsion angles [deg] for No.1.

|                       |           |
|-----------------------|-----------|
| N(1)-C(1)-C(2)-O(1)   | -162.9(3) |
| N(1)-C(1)-C(2)-N(3)   | 17.8(4)   |
| N(3)-C(3)-C(4)-C(5)   | 174.8(3)  |
| C(8)-C(3)-C(4)-C(5)   | -2.2(4)   |
| C(3)-C(4)-C(5)-C(6)   | 2.6(4)    |
| C(4)-C(5)-C(6)-C(7)   | -3.0(4)   |
| C(5)-C(6)-C(7)-C(8)   | 3.1(4)    |
| N(3)-C(3)-C(8)-C(7)   | -175.0(3) |
| C(4)-C(3)-C(8)-C(7)   | 2.2(4)    |
| N(3)-C(3)-C(8)-C(9)   | 3.6(4)    |
| C(4)-C(3)-C(8)-C(9)   | -179.3(3) |
| C(6)-C(7)-C(8)-C(3)   | -2.7(4)   |
| C(6)-C(7)-C(8)-C(9)   | 178.7(3)  |
| C(3)-C(8)-C(9)-O(2)   | -21.5(5)  |
| C(7)-C(8)-C(9)-O(2)   | 157.0(3)  |
| C(3)-C(8)-C(9)-C(10)  | 164.7(3)  |
| C(7)-C(8)-C(9)-C(10)  | -16.7(4)  |
| O(2)-C(9)-C(10)-C(11) | 138.5(3)  |
| C(8)-C(9)-C(10)-C(11) | -47.3(5)  |
| O(2)-C(9)-C(10)-C(15) | -40.9(4)  |

|                         |           |
|-------------------------|-----------|
| C(8)-C(9)-C(10)-C(15)   | 133.2(3)  |
| C(15)-C(10)-C(11)-C(12) | 0.6(5)    |
| C(9)-C(10)-C(11)-C(12)  | -178.8(3) |
| C(10)-C(11)-C(12)-C(13) | -0.9(5)   |
| C(11)-C(12)-C(13)-O(3)  | -176.4(3) |
| C(11)-C(12)-C(13)-C(14) | 0.0(5)    |
| C(12)-C(13)-C(14)-C(15) | 1.0(5)    |
| O(3)-C(13)-C(14)-C(15)  | 177.8(3)  |
| C(11)-C(10)-C(15)-C(14) | 0.5(5)    |
| C(9)-C(10)-C(15)-C(14)  | 180.0(3)  |
| C(13)-C(14)-C(15)-C(10) | -1.2(5)   |
| N(1)-C(17)-C(18)-O(4)   | 161.5(3)  |
| N(1)-C(17)-C(18)-N(2)   | -16.4(3)  |
| N(2)-C(19)-C(20)-C(21)  | -176.5(3) |
| C(24)-C(19)-C(20)-C(21) | -1.3(4)   |
| C(19)-C(20)-C(21)-C(22) | 2.7(5)    |
| C(20)-C(21)-C(22)-C(23) | -4.7(5)   |
| C(21)-C(22)-C(23)-C(24) | 5.5(5)    |
| N(2)-C(19)-C(24)-C(23)  | 176.9(3)  |
| C(20)-C(19)-C(24)-C(23) | 1.9(4)    |
| N(2)-C(19)-C(24)-C(25)  | -1.7(5)   |
| C(20)-C(19)-C(24)-C(25) | -176.8(3) |
| C(22)-C(23)-C(24)-C(19) | -4.0(5)   |
| C(22)-C(23)-C(24)-C(25) | 174.7(3)  |
| C(19)-C(24)-C(25)-O(5)  | 42.3(5)   |
| C(23)-C(24)-C(25)-O(5)  | -136.3(3) |
| C(19)-C(24)-C(25)-C(26) | -140.0(3) |
| C(23)-C(24)-C(25)-C(26) | 41.4(4)   |
| O(5)-C(25)-C(26)-C(27)  | -120.5(3) |
| C(24)-C(25)-C(26)-C(27) | 61.8(4)   |
| O(5)-C(25)-C(26)-C(31)  | 60.8(4)   |
| C(24)-C(25)-C(26)-C(31) | -116.9(3) |
| C(31)-C(26)-C(27)-C(28) | -2.5(5)   |
| C(25)-C(26)-C(27)-C(28) | 178.7(3)  |
| C(26)-C(27)-C(28)-C(29) | 1.8(5)    |
| C(27)-C(28)-C(29)-C(30) | 0.0(5)    |
| C(28)-C(29)-C(30)-C(31) | -0.9(5)   |
| C(27)-C(26)-C(31)-C(30) | 1.5(4)    |
| C(25)-C(26)-C(31)-C(30) | -179.7(3) |
| C(27)-C(26)-C(31)-C(32) | 179.4(3)  |
| C(25)-C(26)-C(31)-C(32) | -1.9(5)   |
| C(29)-C(30)-C(31)-C(26) | 0.1(5)    |
| C(29)-C(30)-C(31)-C(32) | -177.9(3) |
| C(26)-C(31)-C(32)-F(3)  | 162.7(3)  |

|                         |           |
|-------------------------|-----------|
| C(30)-C(31)-C(32)-F(3)  | -19.4(4)  |
| C(26)-C(31)-C(32)-F(1)  | -74.6(4)  |
| C(30)-C(31)-C(32)-F(1)  | 103.3(3)  |
| C(26)-C(31)-C(32)-F(2)  | 42.0(4)   |
| C(30)-C(31)-C(32)-F(2)  | -140.1(3) |
| N(1)-C(33)-C(34)-C(39)  | -87.9(3)  |
| N(1)-C(33)-C(34)-C(35)  | 90.6(3)   |
| C(39)-C(34)-C(35)-C(36) | 1.0(4)    |
| C(33)-C(34)-C(35)-C(36) | -177.5(3) |
| C(34)-C(35)-C(36)-C(37) | -1.5(4)   |
| C(35)-C(36)-C(37)-C(38) | 0.5(4)    |
| C(36)-C(37)-C(38)-C(39) | 1.0(4)    |
| C(37)-C(38)-C(39)-C(34) | -1.4(4)   |
| C(35)-C(34)-C(39)-C(38) | 0.4(4)    |
| C(33)-C(34)-C(39)-C(38) | 178.9(3)  |
| C(2)-C(1)-N(1)-C(17)    | -147.1(3) |
| C(2)-C(1)-N(1)-C(33)    | 88.8(3)   |
| C(2)-C(1)-N(1)-Ni(1)    | -30.5(3)  |
| C(18)-C(17)-N(1)-C(1)   | 146.3(3)  |
| C(18)-C(17)-N(1)-C(33)  | -88.7(3)  |
| C(18)-C(17)-N(1)-Ni(1)  | 31.9(3)   |
| C(34)-C(33)-N(1)-C(1)   | -68.7(3)  |
| C(34)-C(33)-N(1)-C(17)  | 165.7(2)  |
| C(34)-C(33)-N(1)-Ni(1)  | 46.8(3)   |
| O(4)-C(18)-N(2)-C(19)   | 3.8(4)    |
| C(17)-C(18)-N(2)-C(19)  | -178.4(3) |
| O(4)-C(18)-N(2)-Ni(1)   | 174.6(2)  |
| C(17)-C(18)-N(2)-Ni(1)  | -7.6(3)   |
| C(20)-C(19)-N(2)-C(18)  | -122.8(3) |
| C(24)-C(19)-N(2)-C(18)  | 62.2(4)   |
| C(20)-C(19)-N(2)-Ni(1)  | 67.3(4)   |
| C(24)-C(19)-N(2)-Ni(1)  | -107.7(3) |
| O(1)-C(2)-N(3)-C(3)     | 13.0(5)   |
| C(1)-C(2)-N(3)-C(3)     | -167.7(3) |
| O(1)-C(2)-N(3)-Ni(1)    | -173.8(3) |
| C(1)-C(2)-N(3)-Ni(1)    | 5.4(3)    |
| C(4)-C(3)-N(3)-C(2)     | 21.3(4)   |
| C(8)-C(3)-N(3)-C(2)     | -161.8(3) |
| C(4)-C(3)-N(3)-Ni(1)    | -151.1(2) |
| C(8)-C(3)-N(3)-Ni(1)    | 25.8(4)   |
| C(2)-N(3)-Ni(1)-O(2)    | 156.5(2)  |
| C(3)-N(3)-Ni(1)-O(2)    | -30.6(2)  |
| C(2)-N(3)-Ni(1)-N(1)    | -19.8(2)  |
| C(3)-N(3)-Ni(1)-N(1)    | 153.2(2)  |



|                        |            |
|------------------------|------------|
| C(18)-N(2)-Ni(1)-O(2)  | -154.3(2)  |
| C(19)-N(2)-Ni(1)-O(2)  | 16.1(2)    |
| C(18)-N(2)-Ni(1)-N(1)  | 22.1(2)    |
| C(19)-N(2)-Ni(1)-N(1)  | -167.5(2)  |
| C(1)-N(1)-Ni(1)-N(3)   | 27.4(2)    |
| C(17)-N(1)-Ni(1)-N(3)  | 147.24(19) |
| C(33)-N(1)-Ni(1)-N(3)  | -92.57(19) |
| C(1)-N(1)-Ni(1)-N(2)   | -149.7(2)  |
| C(17)-N(1)-Ni(1)-N(2)  | -29.9(2)   |
| C(33)-N(1)-Ni(1)-N(2)  | 90.28(19)  |
| C(8)-C(9)-O(2)-Ni(1)   | 8.3(4)     |
| C(10)-C(9)-O(2)-Ni(1)  | -177.4(2)  |
| N(3)-Ni(1)-O(2)-C(9)   | 13.7(3)    |
| N(2)-Ni(1)-O(2)-C(9)   | -169.6(3)  |
| C(12)-C(13)-O(3)-C(16) | 1.5(4)     |
| C(14)-C(13)-O(3)-C(16) | -175.2(3)  |

---

Symmetry transformations used to generate equivalent atoms:

Table 7. Hydrogen bonds for No.1 [A and deg.].

---

| D-H...A | d(D-H) | d(H...A) | d(D...A) | <(DHA) |
|---------|--------|----------|----------|--------|
|---------|--------|----------|----------|--------|

ORTEP drawing of compound 14. (CCDC number 951883)

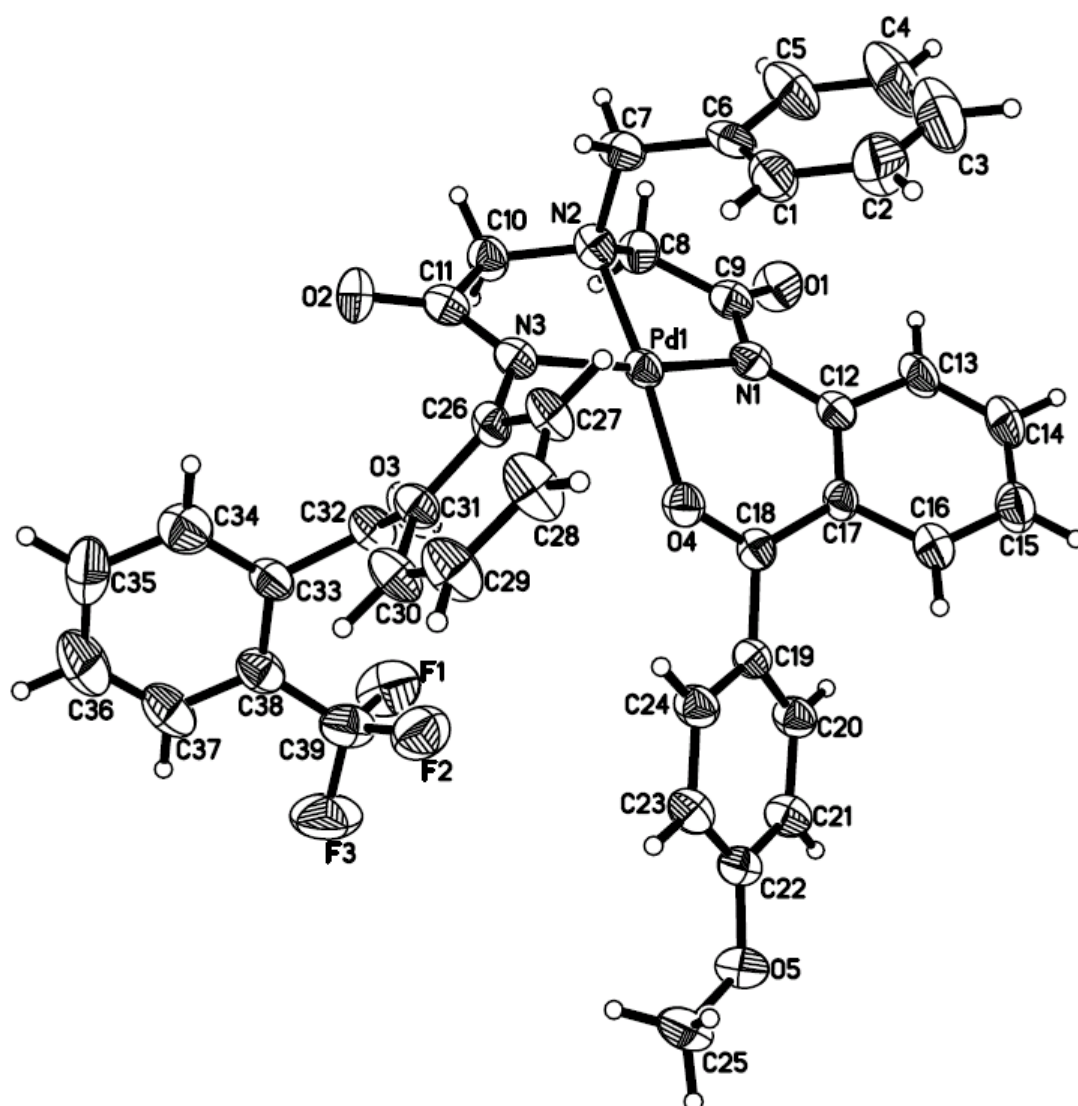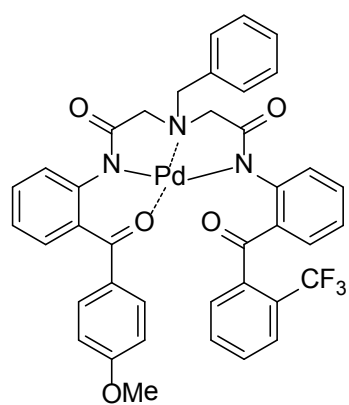

Pd-o-CF<sub>3</sub>-p-OMe

Table 1. Crystal data and structure refinement for complex **14**.

|                                   |                                                                                  |
|-----------------------------------|----------------------------------------------------------------------------------|
| Identification code               | Pd-o-CF3-p-OMe                                                                   |
| Empirical formula                 | C <sub>39</sub> H <sub>30</sub> F <sub>3</sub> N <sub>3</sub> O <sub>5</sub> Pd  |
| Formula weight                    | 784.06                                                                           |
| Temperature                       | 293(2) K                                                                         |
| Wavelength                        | 1.54186 Å                                                                        |
| Crystal system                    | Orthorhombic                                                                     |
| Space group                       | <i>P b c a</i>                                                                   |
| Unit cell dimensions              | <i>a</i> = 10.9428(2) Å.<br><i>b</i> = 23.9074(4) Å.<br><i>c</i> = 26.1834(5) Å. |
| Volume                            | 6849.9(2) Å <sup>3</sup>                                                         |
| Z                                 | 8                                                                                |
| Density (calculated)              | 1.521 Mg/m <sup>3</sup>                                                          |
| Absorption coefficient            | 4.935 mm <sup>-1</sup>                                                           |
| F(000)                            | 3184                                                                             |
| Crystal size                      | 0.09 x 0.02 x 0.02 mm <sup>3</sup>                                               |
| Theta range for data collection   | 4.75 to 68.17°.                                                                  |
| Index ranges                      | -13<= <i>h</i> <=13, -28<= <i>k</i> <=28, -31<= <i>l</i> <=31                    |
| Reflections collected             | 74634                                                                            |
| Independent reflections           | 6252 [R(int) = 0.0564]                                                           |
| Completeness to theta = 68.17°    | 99.9 %                                                                           |
| Absorption correction             | Semi-empirical from equivalents                                                  |
| Max. and min. transmission        | 0.9077 and 0.7593                                                                |
| Refinement method                 | Full-matrix least-squares on F <sup>2</sup>                                      |
| Data / restraints / parameters    | 6252 / 0 / 461                                                                   |
| Goodness-of-fit on F <sup>2</sup> | 1.109                                                                            |
| Final R indices [I>2σ(I)]         | R1 = 0.0584, wR2 = 0.1344                                                        |
| R indices (all data)              | R1 = 0.0997, wR2 = 0.1883                                                        |
| Extinction coefficient            | 0.00023(4)                                                                       |
| Largest diff. peak and hole       | 1.308 and -1.081 e.Å <sup>-3</sup>                                               |

Table 2. Atomic coordinates ( x 10<sup>4</sup>) and equivalent isotropic displacement parameters (Å<sup>2</sup>x 10<sup>3</sup>) for Pd-o-CF3-p-OMe. U(eq) is defined as one third of the trace of the orthogonalized U<sup>ij</sup> tensor.

|       | x        | y       | z       | U(eq)  |
|-------|----------|---------|---------|--------|
| C(1)  | 6722(9)  | 124(4)  | 6399(3) | 79(3)  |
| C(2)  | 7473(13) | -35(6)  | 6800(5) | 116(4) |
| C(3)  | 7193(17) | 133(6)  | 7286(5) | 136(6) |
| C(4)  | 6174(18) | 445(5)  | 7379(4) | 137(6) |
| C(5)  | 5410(12) | 601(4)  | 6973(3) | 96(3)  |
| C(25) | 13682(9) | 1948(4) | 3802(3) | 78(3)  |

|       |          |         |         |        |
|-------|----------|---------|---------|--------|
| C(6)  | 5697(9)  | 451(3)  | 6482(3) | 64(2)  |
| C(7)  | 4884(8)  | 602(3)  | 6040(3) | 63(2)  |
| C(8)  | 5138(7)  | 1641(3) | 6094(3) | 63(2)  |
| C(9)  | 6297(8)  | 1789(3) | 6382(3) | 61(2)  |
| C(10) | 4584(7)  | 1155(4) | 5265(3) | 62(2)  |
| C(11) | 5187(7)  | 814(3)  | 4846(3) | 57(2)  |
| C(12) | 8506(7)  | 1631(3) | 6384(3) | 53(2)  |
| C(13) | 8660(9)  | 1716(3) | 6910(3) | 67(2)  |
| C(14) | 9807(9)  | 1748(4) | 7123(3) | 72(2)  |
| C(15) | 10849(9) | 1689(4) | 6829(3) | 75(2)  |
| C(16) | 10717(8) | 1610(3) | 6310(3) | 62(2)  |
| C(17) | 9554(7)  | 1587(3) | 6070(2) | 49(2)  |
| C(18) | 9535(7)  | 1502(3) | 5515(2) | 49(2)  |
| C(19) | 10541(6) | 1703(3) | 5187(2) | 49(2)  |
| C(20) | 11216(7) | 2186(3) | 5293(3) | 59(2)  |
| C(21) | 12134(7) | 2355(3) | 4973(3) | 62(2)  |
| C(22) | 12424(7) | 2053(3) | 4541(3) | 57(2)  |
| C(23) | 11738(7) | 1577(3) | 4420(3) | 63(2)  |
| C(24) | 10804(7) | 1413(3) | 4734(3) | 59(2)  |
| C(26) | 7155(7)  | 464(3)  | 4573(2) | 48(2)  |
| C(27) | 7842(8)  | 13(3)   | 4724(3) | 64(2)  |
| C(28) | 8673(10) | -235(4) | 4394(3) | 84(3)  |
| C(29) | 8800(9)  | -40(4)  | 3901(3) | 83(3)  |
| C(30) | 8121(8)  | 416(3)  | 3745(3) | 70(2)  |
| C(31) | 7319(7)  | 686(3)  | 4074(3) | 53(2)  |
| C(32) | 6786(7)  | 1222(3) | 3914(3) | 59(2)  |
| C(33) | 6555(8)  | 1312(3) | 3354(3) | 60(2)  |
| C(34) | 5697(9)  | 986(4)  | 3113(4) | 81(3)  |
| C(35) | 5384(11) | 1088(5) | 2603(4) | 107(4) |
| C(36) | 5967(13) | 1519(6) | 2347(4) | 112(4) |
| C(37) | 6823(11) | 1838(5) | 2582(4) | 89(3)  |
| C(38) | 7119(8)  | 1746(4) | 3079(3) | 66(2)  |
| C(39) | 8097(9)  | 2088(4) | 3317(4) | 83(3)  |
| O(1)  | 6225(6)  | 2100(3) | 6754(2) | 83(2)  |
| O(2)  | 4589(5)  | 668(2)  | 4467(2) | 70(2)  |
| O(3)  | 6541(7)  | 1599(2) | 4213(2) | 83(2)  |
| O(4)  | 8713(5)  | 1239(2) | 5288(2) | 59(1)  |
| O(5)  | 13390(5) | 2234(2) | 4265(2) | 70(2)  |
| N(1)  | 7337(6)  | 1579(3) | 6173(2) | 55(2)  |
| N(2)  | 5266(6)  | 1125(2) | 5761(2) | 57(2)  |
| N(3)  | 6371(6)  | 717(2)  | 4937(2) | 53(1)  |
| F(1)  | 7701(6)  | 2471(3) | 3655(3) | 114(2) |
| F(2)  | 8916(5)  | 1780(3) | 3572(2) | 105(2) |
| F(3)  | 8740(6)  | 2379(3) | 2977(3) | 134(3) |

Pd(1) 7014(1) 1134(1) 5549(1) 49(1)

---

Table 3. Bond lengths [Å] and angles [°] for Pd-o-CF<sub>3</sub>-p-OMe.

---

|              |           |
|--------------|-----------|
| C(1)-C(6)    | 1.385(12) |
| C(1)-C(2)    | 1.387(14) |
| C(1)-H(1)    | 0.9300    |
| C(2)-C(3)    | 1.370(18) |
| C(2)-H(2)    | 0.9300    |
| C(3)-C(4)    | 1.36(2)   |
| C(3)-H(3)    | 0.9300    |
| C(4)-C(5)    | 1.404(16) |
| C(4)-H(4)    | 0.9300    |
| C(5)-C(6)    | 1.369(11) |
| C(5)-H(5)    | 0.9300    |
| C(25)-O(5)   | 1.428(9)  |
| C(25)-H(25A) | 0.9600    |
| C(25)-H(25B) | 0.9600    |
| C(25)-H(25C) | 0.9600    |
| C(6)-C(7)    | 1.504(11) |
| C(7)-N(2)    | 1.507(9)  |
| C(7)-H(7A)   | 0.9700    |
| C(7)-H(7B)   | 0.9700    |
| C(8)-N(2)    | 1.517(9)  |
| C(8)-C(9)    | 1.518(11) |
| C(8)-H(8A)   | 0.9700    |
| C(8)-H(8B)   | 0.9700    |
| C(9)-O(1)    | 1.227(8)  |
| C(9)-N(1)    | 1.359(9)  |
| C(10)-N(2)   | 1.498(9)  |
| C(10)-C(11)  | 1.521(10) |
| C(10)-H(10A) | 0.9700    |
| C(10)-H(10B) | 0.9700    |
| C(11)-O(2)   | 1.239(9)  |
| C(11)-N(3)   | 1.337(9)  |
| C(12)-N(1)   | 1.399(9)  |
| C(12)-C(13)  | 1.403(9)  |
| C(12)-C(17)  | 1.415(10) |
| C(13)-C(14)  | 1.375(12) |
| C(13)-H(13)  | 0.9300    |
| C(14)-C(15)  | 1.383(12) |
| C(14)-H(14)  | 0.9300    |
| C(15)-C(16)  | 1.378(10) |

|             |           |
|-------------|-----------|
| C(15)-H(15) | 0.9300    |
| C(16)-C(17) | 1.421(10) |
| C(16)-H(16) | 0.9300    |
| C(17)-C(18) | 1.466(8)  |
| C(18)-O(4)  | 1.248(8)  |
| C(18)-C(19) | 1.478(9)  |
| C(19)-C(20) | 1.399(10) |
| C(19)-C(24) | 1.402(9)  |
| C(20)-C(21) | 1.369(10) |
| C(20)-H(20) | 0.9300    |
| C(21)-C(22) | 1.378(10) |
| C(21)-H(21) | 0.9300    |
| C(22)-O(5)  | 1.352(9)  |
| C(22)-C(23) | 1.400(11) |
| C(23)-C(24) | 1.369(10) |
| C(23)-H(23) | 0.9300    |
| C(24)-H(24) | 0.9300    |
| C(26)-C(27) | 1.373(10) |
| C(26)-N(3)  | 1.418(8)  |
| C(26)-C(31) | 1.421(9)  |
| C(27)-C(28) | 1.388(11) |
| C(27)-H(27) | 0.9300    |
| C(28)-C(29) | 1.380(11) |
| C(28)-H(28) | 0.9300    |
| C(29)-C(30) | 1.380(11) |
| C(29)-H(29) | 0.9300    |
| C(30)-C(31) | 1.390(10) |
| C(30)-H(30) | 0.9300    |
| C(31)-C(32) | 1.470(10) |
| C(32)-O(3)  | 1.222(8)  |
| C(32)-C(33) | 1.503(10) |
| C(33)-C(34) | 1.374(12) |
| C(33)-C(38) | 1.404(11) |
| C(34)-C(35) | 1.402(13) |
| C(34)-H(34) | 0.9300    |
| C(35)-C(36) | 1.384(16) |
| C(35)-H(35) | 0.9300    |
| C(36)-C(37) | 1.355(16) |
| C(36)-H(36) | 0.9300    |
| C(37)-C(38) | 1.361(12) |
| C(37)-H(37) | 0.9300    |
| C(38)-C(39) | 1.484(13) |
| C(39)-F(3)  | 1.331(10) |
| C(39)-F(2)  | 1.339(10) |

|                     |           |
|---------------------|-----------|
| C(39)-F(1)          | 1.346(11) |
| O(4)-Pd(1)          | 1.996(5)  |
| N(1)-Pd(1)          | 1.983(6)  |
| N(2)-Pd(1)          | 1.992(7)  |
| N(3)-Pd(1)          | 2.012(6)  |
| C(6)-C(1)-C(2)      | 121.0(10) |
| C(6)-C(1)-H(1)      | 119.5     |
| C(2)-C(1)-H(1)      | 119.5     |
| C(3)-C(2)-C(1)      | 119.4(14) |
| C(3)-C(2)-H(2)      | 120.3     |
| C(1)-C(2)-H(2)      | 120.3     |
| C(4)-C(3)-C(2)      | 120.7(13) |
| C(4)-C(3)-H(3)      | 119.7     |
| C(2)-C(3)-H(3)      | 119.7     |
| C(3)-C(4)-C(5)      | 119.8(12) |
| C(3)-C(4)-H(4)      | 120.1     |
| C(5)-C(4)-H(4)      | 120.1     |
| C(6)-C(5)-C(4)      | 120.4(12) |
| C(6)-C(5)-H(5)      | 119.8     |
| C(4)-C(5)-H(5)      | 119.8     |
| O(5)-C(25)-H(25A)   | 109.5     |
| O(5)-C(25)-H(25B)   | 109.5     |
| H(25A)-C(25)-H(25B) | 109.5     |
| O(5)-C(25)-H(25C)   | 109.5     |
| H(25A)-C(25)-H(25C) | 109.5     |
| H(25B)-C(25)-H(25C) | 109.5     |
| C(5)-C(6)-C(1)      | 118.8(9)  |
| C(5)-C(6)-C(7)      | 121.6(9)  |
| C(1)-C(6)-C(7)      | 119.5(7)  |
| C(6)-C(7)-N(2)      | 114.1(6)  |
| C(6)-C(7)-H(7A)     | 108.7     |
| N(2)-C(7)-H(7A)     | 108.7     |
| C(6)-C(7)-H(7B)     | 108.7     |
| N(2)-C(7)-H(7B)     | 108.7     |
| H(7A)-C(7)-H(7B)    | 107.6     |
| N(2)-C(8)-C(9)      | 113.5(6)  |
| N(2)-C(8)-H(8A)     | 108.9     |
| C(9)-C(8)-H(8A)     | 108.9     |
| N(2)-C(8)-H(8B)     | 108.9     |
| C(9)-C(8)-H(8B)     | 108.9     |
| H(8A)-C(8)-H(8B)    | 107.7     |
| O(1)-C(9)-N(1)      | 126.7(8)  |
| O(1)-C(9)-C(8)      | 118.8(7)  |
| N(1)-C(9)-C(8)      | 114.4(6)  |

|                     |          |
|---------------------|----------|
| N(2)-C(10)-C(11)    | 112.5(6) |
| N(2)-C(10)-H(10A)   | 109.1    |
| C(11)-C(10)-H(10A)  | 109.1    |
| N(2)-C(10)-H(10B)   | 109.1    |
| C(11)-C(10)-H(10B)  | 109.1    |
| H(10A)-C(10)-H(10B) | 107.8    |
| O(2)-C(11)-N(3)     | 127.4(7) |
| O(2)-C(11)-C(10)    | 120.0(7) |
| N(3)-C(11)-C(10)    | 112.6(7) |
| N(1)-C(12)-C(13)    | 120.7(7) |
| N(1)-C(12)-C(17)    | 120.3(6) |
| C(13)-C(12)-C(17)   | 118.9(7) |
| C(14)-C(13)-C(12)   | 121.0(8) |
| C(14)-C(13)-H(13)   | 119.5    |
| C(12)-C(13)-H(13)   | 119.5    |
| C(13)-C(14)-C(15)   | 121.5(7) |
| C(13)-C(14)-H(14)   | 119.3    |
| C(15)-C(14)-H(14)   | 119.3    |
| C(16)-C(15)-C(14)   | 118.4(8) |
| C(16)-C(15)-H(15)   | 120.8    |
| C(14)-C(15)-H(15)   | 120.8    |
| C(15)-C(16)-C(17)   | 122.4(8) |
| C(15)-C(16)-H(16)   | 118.8    |
| C(17)-C(16)-H(16)   | 118.8    |
| C(12)-C(17)-C(16)   | 117.7(6) |
| C(12)-C(17)-C(18)   | 125.0(6) |
| C(16)-C(17)-C(18)   | 117.2(7) |
| O(4)-C(18)-C(17)    | 123.6(6) |
| O(4)-C(18)-C(19)    | 115.0(6) |
| C(17)-C(18)-C(19)   | 121.4(6) |
| C(20)-C(19)-C(24)   | 117.8(7) |
| C(20)-C(19)-C(18)   | 123.2(6) |
| C(24)-C(19)-C(18)   | 119.0(6) |
| C(21)-C(20)-C(19)   | 120.7(7) |
| C(21)-C(20)-H(20)   | 119.6    |
| C(19)-C(20)-H(20)   | 119.6    |
| C(20)-C(21)-C(22)   | 121.0(7) |
| C(20)-C(21)-H(21)   | 119.5    |
| C(22)-C(21)-H(21)   | 119.5    |
| O(5)-C(22)-C(21)    | 116.8(7) |
| O(5)-C(22)-C(23)    | 124.0(7) |
| C(21)-C(22)-C(23)   | 119.2(7) |
| C(24)-C(23)-C(22)   | 119.8(7) |
| C(24)-C(23)-H(23)   | 120.1    |



|                   |           |
|-------------------|-----------|
| C(22)-C(23)-H(23) | 120.1     |
| C(23)-C(24)-C(19) | 121.3(7)  |
| C(23)-C(24)-H(24) | 119.3     |
| C(19)-C(24)-H(24) | 119.3     |
| C(27)-C(26)-N(3)  | 118.2(6)  |
| C(27)-C(26)-C(31) | 119.2(6)  |
| N(3)-C(26)-C(31)  | 122.4(6)  |
| C(26)-C(27)-C(28) | 121.1(7)  |
| C(26)-C(27)-H(27) | 119.5     |
| C(28)-C(27)-H(27) | 119.5     |
| C(29)-C(28)-C(27) | 120.2(8)  |
| C(29)-C(28)-H(28) | 119.9     |
| C(27)-C(28)-H(28) | 119.9     |
| C(28)-C(29)-C(30) | 119.3(8)  |
| C(28)-C(29)-H(29) | 120.3     |
| C(30)-C(29)-H(29) | 120.3     |
| C(29)-C(30)-C(31) | 121.6(7)  |
| C(29)-C(30)-H(30) | 119.2     |
| C(31)-C(30)-H(30) | 119.2     |
| C(30)-C(31)-C(26) | 118.5(7)  |
| C(30)-C(31)-C(32) | 118.7(6)  |
| C(26)-C(31)-C(32) | 122.5(6)  |
| O(3)-C(32)-C(31)  | 123.2(7)  |
| O(3)-C(32)-C(33)  | 118.8(7)  |
| C(31)-C(32)-C(33) | 118.0(6)  |
| C(34)-C(33)-C(38) | 119.0(8)  |
| C(34)-C(33)-C(32) | 118.8(7)  |
| C(38)-C(33)-C(32) | 122.1(7)  |
| C(33)-C(34)-C(35) | 120.4(9)  |
| C(33)-C(34)-H(34) | 119.8     |
| C(35)-C(34)-H(34) | 119.8     |
| C(36)-C(35)-C(34) | 118.5(11) |
| C(36)-C(35)-H(35) | 120.7     |
| C(34)-C(35)-H(35) | 120.7     |
| C(37)-C(36)-C(35) | 121.3(10) |
| C(37)-C(36)-H(36) | 119.4     |
| C(35)-C(36)-H(36) | 119.4     |
| C(36)-C(37)-C(38) | 120.5(10) |
| C(36)-C(37)-H(37) | 119.8     |
| C(38)-C(37)-H(37) | 119.8     |
| C(37)-C(38)-C(33) | 120.4(9)  |
| C(37)-C(38)-C(39) | 118.9(9)  |
| C(33)-C(38)-C(39) | 120.6(8)  |
| F(3)-C(39)-F(2)   | 105.5(8)  |

|                  |          |
|------------------|----------|
| F(3)-C(39)-F(1)  | 104.8(9) |
| F(2)-C(39)-F(1)  | 105.1(9) |
| F(3)-C(39)-C(38) | 112.9(9) |
| F(2)-C(39)-C(38) | 112.9(8) |
| F(1)-C(39)-C(38) | 114.8(8) |
| C(18)-O(4)-Pd(1) | 124.8(4) |
| C(22)-O(5)-C(25) | 118.5(6) |
| C(9)-N(1)-C(12)  | 125.0(6) |
| C(9)-N(1)-Pd(1)  | 112.4(5) |
| C(12)-N(1)-Pd(1) | 122.4(5) |
| C(10)-N(2)-C(7)  | 108.8(6) |
| C(10)-N(2)-C(8)  | 114.3(6) |
| C(7)-N(2)-C(8)   | 111.7(6) |
| C(10)-N(2)-Pd(1) | 103.7(4) |
| C(7)-N(2)-Pd(1)  | 114.2(5) |
| C(8)-N(2)-Pd(1)  | 103.9(5) |
| C(11)-N(3)-C(26) | 122.6(6) |
| C(11)-N(3)-Pd(1) | 113.4(5) |
| C(26)-N(3)-Pd(1) | 122.3(5) |
| N(1)-Pd(1)-N(2)  | 87.0(2)  |
| N(1)-Pd(1)-O(4)  | 92.8(2)  |
| N(2)-Pd(1)-O(4)  | 172.3(2) |
| N(1)-Pd(1)-N(3)  | 169.7(2) |
| N(2)-Pd(1)-N(3)  | 83.1(2)  |
| O(4)-Pd(1)-N(3)  | 96.7(2)  |

---

Symmetry transformations used to generate equivalent atoms:

Table 4. Anisotropic displacement parameters ( $\text{\AA}^2 \times 10^3$ ) for Pd-o-CF<sub>3</sub>-p-OMe. The anisotropic displacement factor exponent takes the form:  $-2\pi^2 [ h^2 a^{*2} U^{11} + \dots + 2 h k a^* b^* U^{12} ]$

|       | U <sup>11</sup> | U <sup>22</sup> | U <sup>33</sup> | U <sup>23</sup> | U <sup>13</sup> | U <sup>12</sup> |
|-------|-----------------|-----------------|-----------------|-----------------|-----------------|-----------------|
| C(1)  | 100(7)          | 77(6)           | 61(5)           | 12(5)           | -5(5)           | -7(5)           |
| C(2)  | 119(9)          | 119(10)         | 110(9)          | 24(8)           | -25(8)          | -13(8)          |
| C(3)  | 220(18)         | 99(10)          | 88(9)           | 19(8)           | -57(11)         | -22(11)         |
| C(4)  | 270(20)         | 91(9)           | 53(6)           | -1(6)           | -20(9)          | -4(11)          |
| C(5)  | 160(10)         | 76(6)           | 52(5)           | 2(4)            | 10(6)           | 6(7)            |
| C(25) | 87(7)           | 88(6)           | 60(5)           | 9(5)            | 25(5)           | 7(5)            |
| C(6)  | 94(6)           | 54(4)           | 44(4)           | 5(3)            | 15(4)           | -21(4)          |
| C(7)  | 76(5)           | 59(5)           | 53(4)           | 1(4)            | 11(4)           | -12(4)          |
| C(8)  | 70(5)           | 59(5)           | 59(4)           | -12(4)          | 1(4)            | -3(4)           |
| C(9)  | 71(5)           | 59(5)           | 52(4)           | -1(4)           | 11(4)           | 0(4)            |

|       |         |         |        |        |        |        |
|-------|---------|---------|--------|--------|--------|--------|
| C(10) | 61(5)   | 76(5)   | 49(4)  | -6(4)  | 3(3)   | 7(4)   |
| C(11) | 64(5)   | 55(4)   | 51(4)  | 3(3)   | 12(4)  | 4(4)   |
| C(12) | 67(5)   | 49(4)   | 42(4)  | 2(3)   | 1(3)   | -4(4)  |
| C(13) | 91(6)   | 76(5)   | 34(3)  | -2(4)  | 0(4)   | -6(5)  |
| C(14) | 103(7)  | 74(6)   | 39(4)  | -4(4)  | -13(4) | 1(5)   |
| C(15) | 86(6)   | 86(6)   | 54(5)  | 3(4)   | -17(5) | -6(5)  |
| C(16) | 75(5)   | 62(5)   | 49(4)  | 2(4)   | -5(4)  | 1(4)   |
| C(17) | 59(4)   | 52(4)   | 36(3)  | -7(3)  | -8(3)  | -7(3)  |
| C(18) | 60(4)   | 41(3)   | 46(4)  | -4(3)  | -4(3)  | -5(3)  |
| C(19) | 53(4)   | 51(4)   | 43(3)  | -2(3)  | 1(3)   | 1(3)   |
| C(20) | 70(5)   | 58(4)   | 50(4)  | -6(3)  | 6(4)   | -6(4)  |
| C(21) | 74(5)   | 50(4)   | 62(4)  | 0(4)   | 7(4)   | -4(4)  |
| C(22) | 58(4)   | 58(4)   | 54(4)  | 5(3)   | 7(4)   | -1(4)  |
| C(23) | 74(5)   | 66(5)   | 49(4)  | -2(4)  | 7(4)   | 3(4)   |
| C(24) | 68(5)   | 61(5)   | 47(4)  | -7(3)  | 6(4)   | -8(4)  |
| C(26) | 65(5)   | 44(4)   | 35(3)  | -13(3) | -2(3)  | -3(3)  |
| C(27) | 86(6)   | 63(5)   | 44(4)  | 12(4)  | 2(4)   | 14(4)  |
| C(28) | 122(8)  | 70(6)   | 59(5)  | 2(4)   | 8(5)   | 39(6)  |
| C(29) | 111(8)  | 78(6)   | 61(5)  | 1(4)   | 15(5)  | 35(6)  |
| C(30) | 101(7)  | 64(5)   | 44(4)  | -3(4)  | 15(4)  | 16(5)  |
| C(31) | 70(5)   | 47(4)   | 43(4)  | -5(3)  | 8(3)   | 3(3)   |
| C(32) | 71(5)   | 53(4)   | 53(4)  | -4(3)  | 10(4)  | 13(4)  |
| C(33) | 75(5)   | 60(4)   | 45(4)  | 1(3)   | 9(4)   | -6(4)  |
| C(34) | 96(7)   | 67(6)   | 80(6)  | -2(5)  | 9(5)   | -7(5)  |
| C(35) | 103(9)  | 132(10) | 86(8)  | -17(7) | -36(7) | 5(8)   |
| C(36) | 143(11) | 127(10) | 66(6)  | 23(7)  | -13(7) | 30(9)  |
| C(37) | 119(9)  | 89(7)   | 61(6)  | 25(5)  | 7(6)   | 18(6)  |
| C(38) | 75(6)   | 64(5)   | 60(5)  | 13(4)  | 6(4)   | 12(4)  |
| C(39) | 76(6)   | 83(6)   | 89(7)  | 22(6)  | 17(5)  | 6(5)   |
| O(1)  | 93(4)   | 92(4)   | 63(3)  | -46(3) | 14(3)  | -3(3)  |
| O(2)  | 75(4)   | 77(4)   | 56(3)  | -12(3) | -20(3) | -1(3)  |
| O(3)  | 137(6)  | 51(3)   | 60(3)  | 0(3)   | 14(4)  | 22(3)  |
| O(4)  | 68(3)   | 62(3)   | 46(3)  | -11(2) | 0(2)   | -9(3)  |
| O(5)  | 72(3)   | 67(3)   | 71(3)  | 2(3)   | 19(3)  | -6(3)  |
| N(1)  | 60(4)   | 57(4)   | 47(3)  | 1(3)   | 9(3)   | 4(3)   |
| N(2)  | 77(4)   | 45(3)   | 49(3)  | -9(3)  | 1(3)   | 3(3)   |
| N(3)  | 59(4)   | 54(3)   | 44(3)  | 0(3)   | 7(3)   | 2(3)   |
| F(1)  | 112(5)  | 86(4)   | 144(5) | -26(4) | 17(4)  | -6(4)  |
| F(2)  | 79(4)   | 113(5)  | 122(5) | 15(4)  | -1(3)  | 1(3)   |
| F(3)  | 121(5)  | 132(6)  | 148(6) | 47(5)  | 35(5)  | -34(4) |
| Pd(1) | 59(1)   | 50(1)   | 37(1)  | -4(1)  | 4(1)   | -1(1)  |

---

Table 5. Hydrogen coordinates ( $\times 10^4$ ) and isotropic displacement parameters ( $\text{\AA}^2 \times 10^3$ ) for Pd-o-CF3-p-OMe.

|        | x     | y    | z    | U(eq) |
|--------|-------|------|------|-------|
| H(1)   | 6909  | 9    | 6069 | 95    |
| H(2)   | 8160  | -254 | 6739 | 139   |
| H(3)   | 7704  | 34   | 7555 | 163   |
| H(4)   | 5986  | 554  | 7711 | 164   |
| H(5)   | 4706  | 807  | 7037 | 115   |
| H(25A) | 14382 | 2121 | 3646 | 118   |
| H(25B) | 13000 | 1969 | 3572 | 118   |
| H(25C) | 13862 | 1564 | 3875 | 118   |
| H(7A)  | 4057  | 652  | 6165 | 76    |
| H(7B)  | 4876  | 293  | 5800 | 76    |
| H(8A)  | 4485  | 1579 | 6338 | 75    |
| H(8B)  | 4905  | 1955 | 5881 | 75    |
| H(10A) | 4533  | 1543 | 5158 | 75    |
| H(10B) | 3758  | 1020 | 5317 | 75    |
| H(13)  | 7976  | 1750 | 7119 | 80    |
| H(14)  | 9884  | 1812 | 7472 | 86    |
| H(15)  | 11620 | 1702 | 6977 | 90    |
| H(16)  | 11414 | 1571 | 6111 | 74    |
| H(20)  | 11039 | 2394 | 5583 | 71    |
| H(21)  | 12569 | 2679 | 5048 | 74    |
| H(23)  | 11916 | 1372 | 4128 | 76    |
| H(24)  | 10334 | 1104 | 4646 | 71    |
| H(27)  | 7750  | -128 | 5053 | 77    |
| H(28)  | 9145  | -535 | 4506 | 100   |
| H(29)  | 9338  | -213 | 3676 | 100   |
| H(30)  | 8202  | 545  | 3412 | 84    |
| H(34)  | 5322  | 695  | 3290 | 97    |
| H(35)  | 4797  | 871  | 2439 | 128   |
| H(36)  | 5767  | 1591 | 2008 | 134   |
| H(37)  | 7211  | 2122 | 2401 | 107   |

Table 6. Torsion angles [ $^\circ$ ] for Pd-o-CF3-p-OMe.

|                     |          |
|---------------------|----------|
| C(6)-C(1)-C(2)-C(3) | 0.1(17)  |
| C(1)-C(2)-C(3)-C(4) | 1(2)     |
| C(2)-C(3)-C(4)-C(5) | -1(2)    |
| C(3)-C(4)-C(5)-C(6) | -1.3(19) |

|                         |           |
|-------------------------|-----------|
| C(4)-C(5)-C(6)-C(1)     | 2.8(15)   |
| C(4)-C(5)-C(6)-C(7)     | 178.8(9)  |
| C(2)-C(1)-C(6)-C(5)     | -2.2(14)  |
| C(2)-C(1)-C(6)-C(7)     | -178.3(9) |
| C(5)-C(6)-C(7)-N(2)     | 96.5(9)   |
| C(1)-C(6)-C(7)-N(2)     | -87.5(9)  |
| N(2)-C(8)-C(9)-O(1)     | -161.5(7) |
| N(2)-C(8)-C(9)-N(1)     | 22.0(9)   |
| N(2)-C(10)-C(11)-O(2)   | 159.9(7)  |
| N(2)-C(10)-C(11)-N(3)   | -21.5(9)  |
| N(1)-C(12)-C(13)-C(14)  | 177.9(7)  |
| C(17)-C(12)-C(13)-C(14) | -0.9(12)  |
| C(12)-C(13)-C(14)-C(15) | -1.2(13)  |
| C(13)-C(14)-C(15)-C(16) | 1.7(13)   |
| C(14)-C(15)-C(16)-C(17) | -0.1(13)  |
| N(1)-C(12)-C(17)-C(16)  | -176.4(7) |
| C(13)-C(12)-C(17)-C(16) | 2.4(10)   |
| N(1)-C(12)-C(17)-C(18)  | 1.5(11)   |
| C(13)-C(12)-C(17)-C(18) | -179.6(7) |
| C(15)-C(16)-C(17)-C(12) | -1.9(11)  |
| C(15)-C(16)-C(17)-C(18) | 180.0(7)  |
| C(12)-C(17)-C(18)-O(4)  | -30.6(11) |
| C(16)-C(17)-C(18)-O(4)  | 147.3(7)  |
| C(12)-C(17)-C(18)-C(19) | 152.4(7)  |
| C(16)-C(17)-C(18)-C(19) | -29.7(10) |
| O(4)-C(18)-C(19)-C(20)  | 150.3(7)  |
| C(17)-C(18)-C(19)-C(20) | -32.4(10) |
| O(4)-C(18)-C(19)-C(24)  | -26.7(10) |
| C(17)-C(18)-C(19)-C(24) | 150.5(7)  |
| C(24)-C(19)-C(20)-C(21) | -2.5(11)  |
| C(18)-C(19)-C(20)-C(21) | -179.6(7) |
| C(19)-C(20)-C(21)-C(22) | -0.5(12)  |
| C(20)-C(21)-C(22)-O(5)  | -176.3(7) |
| C(20)-C(21)-C(22)-C(23) | 2.3(12)   |
| O(5)-C(22)-C(23)-C(24)  | 177.5(7)  |
| C(21)-C(22)-C(23)-C(24) | -0.9(12)  |
| C(22)-C(23)-C(24)-C(19) | -2.1(12)  |
| C(20)-C(19)-C(24)-C(23) | 3.8(11)   |
| C(18)-C(19)-C(24)-C(23) | -179.0(7) |
| N(3)-C(26)-C(27)-C(28)  | -176.7(8) |
| C(31)-C(26)-C(27)-C(28) | -1.4(12)  |
| C(26)-C(27)-C(28)-C(29) | -1.5(15)  |
| C(27)-C(28)-C(29)-C(30) | 2.0(16)   |
| C(28)-C(29)-C(30)-C(31) | 0.6(15)   |

|                         |            |
|-------------------------|------------|
| C(29)-C(30)-C(31)-C(26) | -3.5(13)   |
| C(29)-C(30)-C(31)-C(32) | 169.6(8)   |
| C(27)-C(26)-C(31)-C(30) | 3.9(11)    |
| N(3)-C(26)-C(31)-C(30)  | 179.0(7)   |
| C(27)-C(26)-C(31)-C(32) | -169.0(7)  |
| N(3)-C(26)-C(31)-C(32)  | 6.1(11)    |
| C(30)-C(31)-C(32)-O(3)  | -147.0(9)  |
| C(26)-C(31)-C(32)-O(3)  | 25.8(13)   |
| C(30)-C(31)-C(32)-C(33) | 32.0(11)   |
| C(26)-C(31)-C(32)-C(33) | -155.2(7)  |
| O(3)-C(32)-C(33)-C(34)  | -115.4(10) |
| C(31)-C(32)-C(33)-C(34) | 65.6(11)   |
| O(3)-C(32)-C(33)-C(38)  | 59.7(12)   |
| C(31)-C(32)-C(33)-C(38) | -119.3(9)  |
| C(38)-C(33)-C(34)-C(35) | -0.5(14)   |
| C(32)-C(33)-C(34)-C(35) | 174.7(9)   |
| C(33)-C(34)-C(35)-C(36) | 0.7(17)    |
| C(34)-C(35)-C(36)-C(37) | 0.0(19)    |
| C(35)-C(36)-C(37)-C(38) | -0.9(18)   |
| C(36)-C(37)-C(38)-C(33) | 1.1(15)    |
| C(36)-C(37)-C(38)-C(39) | 177.5(10)  |
| C(34)-C(33)-C(38)-C(37) | -0.4(13)   |
| C(32)-C(33)-C(38)-C(37) | -175.4(8)  |
| C(34)-C(33)-C(38)-C(39) | -176.7(8)  |
| C(32)-C(33)-C(38)-C(39) | 8.2(12)    |
| C(37)-C(38)-C(39)-F(3)  | -12.3(13)  |
| C(33)-C(38)-C(39)-F(3)  | 164.1(8)   |
| C(37)-C(38)-C(39)-F(2)  | -131.9(9)  |
| C(33)-C(38)-C(39)-F(2)  | 44.5(12)   |
| C(37)-C(38)-C(39)-F(1)  | 107.7(10)  |
| C(33)-C(38)-C(39)-F(1)  | -75.9(11)  |
| C(17)-C(18)-O(4)-Pd(1)  | 24.3(10)   |
| C(19)-C(18)-O(4)-Pd(1)  | -158.6(5)  |
| C(21)-C(22)-O(5)-C(25)  | -177.0(7)  |
| C(23)-C(22)-O(5)-C(25)  | 4.6(12)    |
| O(1)-C(9)-N(1)-C(12)    | 7.8(12)    |
| C(8)-C(9)-N(1)-C(12)    | -176.0(7)  |
| O(1)-C(9)-N(1)-Pd(1)    | -176.5(7)  |
| C(8)-C(9)-N(1)-Pd(1)    | -0.3(8)    |
| C(13)-C(12)-N(1)-C(9)   | 24.3(11)   |
| C(17)-C(12)-N(1)-C(9)   | -156.9(7)  |
| C(13)-C(12)-N(1)-Pd(1)  | -151.1(6)  |
| C(17)-C(12)-N(1)-Pd(1)  | 27.8(9)    |
| C(11)-C(10)-N(2)-C(7)   | -83.6(8)   |

|                        |           |
|------------------------|-----------|
| C(11)-C(10)-N(2)-C(8)  | 150.8(7)  |
| C(11)-C(10)-N(2)-Pd(1) | 38.3(7)   |
| C(6)-C(7)-N(2)-C(10)   | 166.8(6)  |
| C(6)-C(7)-N(2)-C(8)    | -66.1(9)  |
| C(6)-C(7)-N(2)-Pd(1)   | 51.5(7)   |
| C(9)-C(8)-N(2)-C(10)   | -143.4(7) |
| C(9)-C(8)-N(2)-C(7)    | 92.5(8)   |
| C(9)-C(8)-N(2)-Pd(1)   | -31.1(7)  |
| O(2)-C(11)-N(3)-C(26)  | 5.9(12)   |
| C(10)-C(11)-N(3)-C(26) | -172.5(6) |
| O(2)-C(11)-N(3)-Pd(1)  | 171.1(6)  |
| C(10)-C(11)-N(3)-Pd(1) | -7.4(8)   |
| C(27)-C(26)-N(3)-C(11) | -128.6(8) |
| C(31)-C(26)-N(3)-C(11) | 56.2(10)  |
| C(27)-C(26)-N(3)-Pd(1) | 67.5(8)   |
| C(31)-C(26)-N(3)-Pd(1) | -107.6(7) |
| C(9)-N(1)-Pd(1)-N(2)   | -14.9(5)  |
| C(12)-N(1)-Pd(1)-N(2)  | 161.0(5)  |
| C(9)-N(1)-Pd(1)-O(4)   | 157.4(5)  |
| C(12)-N(1)-Pd(1)-O(4)  | -26.7(5)  |
| C(9)-N(1)-Pd(1)-N(3)   | 0.7(16)   |
| C(12)-N(1)-Pd(1)-N(3)  | 176.5(11) |
| C(10)-N(2)-Pd(1)-N(1)  | 144.4(5)  |
| C(7)-N(2)-Pd(1)-N(1)   | -97.3(5)  |
| C(8)-N(2)-Pd(1)-N(1)   | 24.6(5)   |
| C(10)-N(2)-Pd(1)-O(4)  | 56.4(17)  |
| C(7)-N(2)-Pd(1)-O(4)   | 174.6(14) |
| C(8)-N(2)-Pd(1)-O(4)   | -63.5(17) |
| C(10)-N(2)-Pd(1)-N(3)  | -32.8(4)  |
| C(7)-N(2)-Pd(1)-N(3)   | 85.4(5)   |
| C(8)-N(2)-Pd(1)-N(3)   | -152.7(5) |
| C(18)-O(4)-Pd(1)-N(1)  | 1.3(6)    |
| C(18)-O(4)-Pd(1)-N(2)  | 88.9(16)  |
| C(18)-O(4)-Pd(1)-N(3)  | 177.2(6)  |
| C(11)-N(3)-Pd(1)-N(1)  | 8.7(16)   |
| C(26)-N(3)-Pd(1)-N(1)  | 173.9(11) |
| C(11)-N(3)-Pd(1)-N(2)  | 24.3(5)   |
| C(26)-N(3)-Pd(1)-N(2)  | -170.5(5) |
| C(11)-N(3)-Pd(1)-O(4)  | -147.9(5) |
| C(26)-N(3)-Pd(1)-O(4)  | 17.3(5)   |

---

Symmetry transformations used to generate equivalent atoms:
